# Supplementary material for: Investigating Stability and Tautomerization of Gossypol—A Spectroscopy Study
Source: MDPI journal article supplement (doi:10.3390/molecules24071286), 2019-04-02
Supplement: s1 [file s1]

# Supporting Information

## Investigating stability and tautomerization of gossypol - a spectroscopy study

Lulu Wang<sup>1,2</sup>, Yanxia Liu<sup>1,2</sup>, Yagang Zhang<sup>\*,1,2,3</sup>, Akram Yasin<sup>1</sup>, Letao Zhang<sup>1</sup>

<sup>1</sup> Xinjiang Technical Institute of Physics and Chemistry, Chinese Academy of Sciences, Urumqi 830011, China; wanglulu@ms.xjb.ac.cn (L.W.); ygzhang@ms.xjb.ac.cn (Y.Z.); zhanglt@ms.xjb.ac.cn (L.Z.); akram@ms.xjb.ac.cn (A.K.); liuyanxia@ms.xjb.ac.cn (L.Y.);

<sup>2</sup> University of Chinese Academy of Sciences, Beijing 100049, China

<sup>3</sup> Department of chemical and environmental engineering, Xinjiang Institute of Engineering, Urumqi 830026, China

\* Correspondence: ygzhang@ms.xjb.ac.cn; Tel.: +86-18129307169

|                                                           |     |
|-----------------------------------------------------------|-----|
| 1. <sup>1</sup> H NMR spectrum of Gossypol solutions..... | S2  |
| 2. UV-VIS absorbance spectra of Gossypol solutions. ....  | S17 |
| 3. ART-FTIR spectra of Gossypol solutions .....           | S20 |
| 4. HPLC-QTOF-MS spectrum of Gossypol solutions .....      | S25 |

## 1.<sup>1</sup>H NMR spectrum of Gossypol solutions.

Sample Preparation for <sup>1</sup>H NMR Spectroscopy Analysis: 5.0 mg of gossypol was dissolved in 0.70 mL of CDCl<sub>3</sub>, CD<sub>3</sub>OD and DMSO-d<sub>6</sub> in 5 mm NMR tube respectively. The samples were stored under various conditions including: (1) N: normal condition without protecting from air and light; (2) L: under natural light and nitrogen protection; (3) A: stored in dark and under nitrogen protection condition. The samples were stored under a specific condition for 0 h, 8 h, 2 days, 3 days, 5 days, 7days, 15 days, 30 days and 45 days at room temperature and <sup>1</sup>H NMR measurements were taken at different time intervals.

The <sup>1</sup>H NMR spectra of gossypol were recorded on a VARIAN 400 MHz spectrometer. The <sup>1</sup>H NMR measurements of gossypol solutions were carried out at the operating frequency 400.22 MHz; scan times, nt=32; line width 1b=1.5Hz spectral width, sw=6377.55Hz; acquisition time, at=1.28s; T=295.0 K and TMS was used as the internal standard.

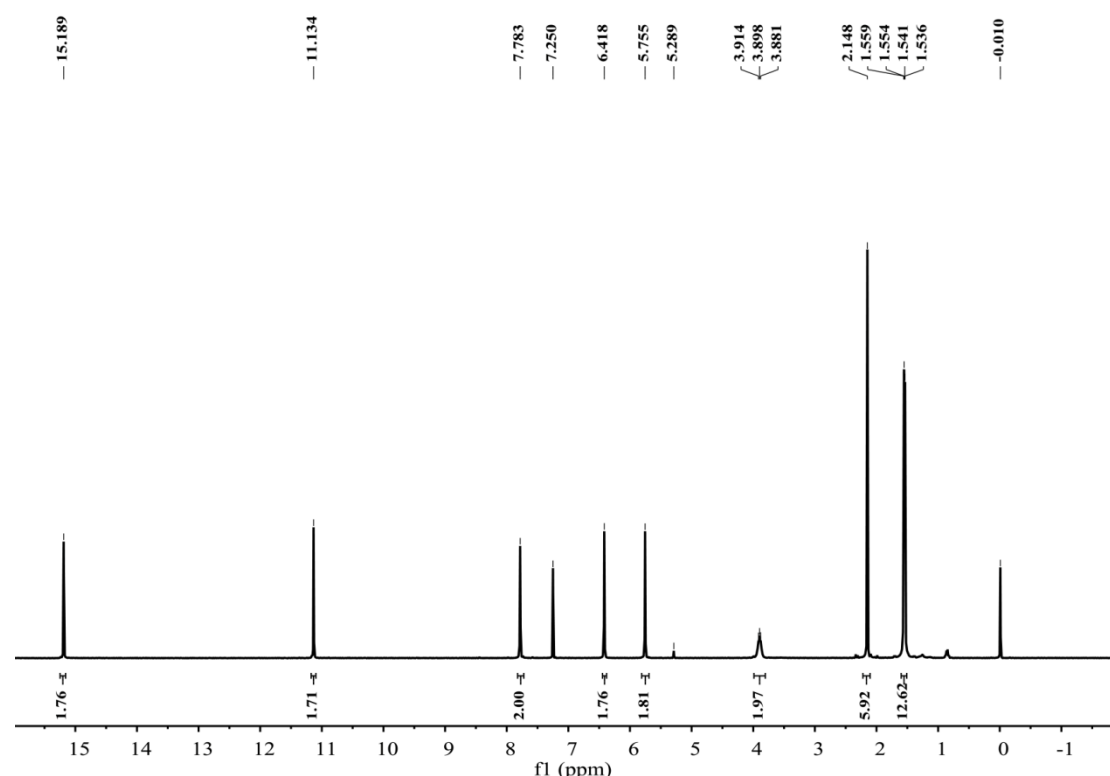

**Figure S1.** <sup>1</sup>H NMR spectrum of Gossypol-CDCl<sub>3</sub> fresh solution under normal condition without protect from air and light storage condition.

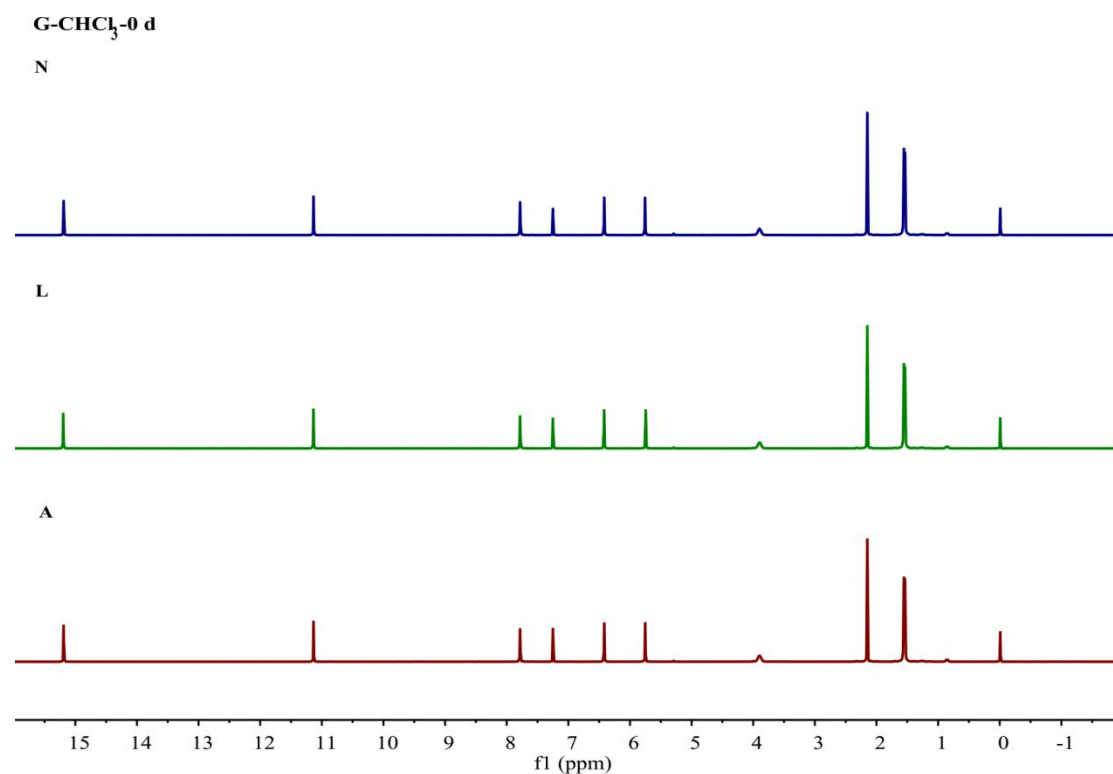

**Figure S2.** <sup>1</sup>H NMR spectrum of the gossypol in CDCl<sub>3</sub> solution under different storage conditions in 0 day (N: normal condition without protecting from air and light; L: under natural light and nitrogen protection; A: stored in dark and under nitrogen protection condition).

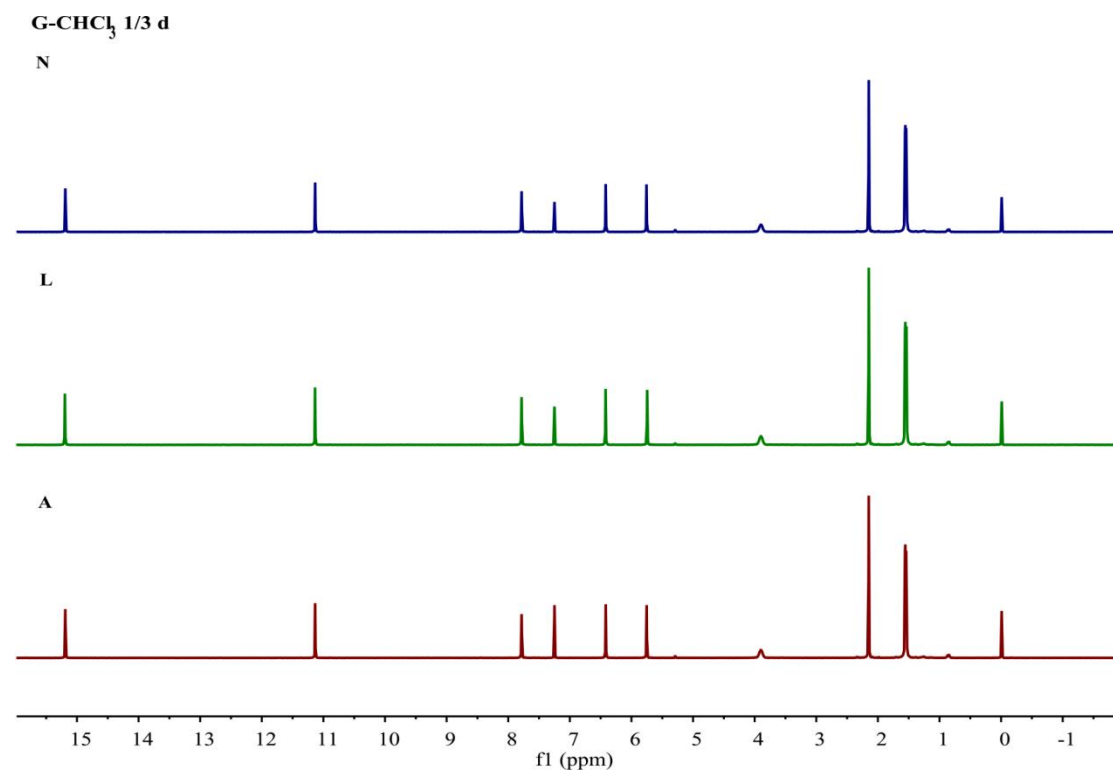

**Figure S3.** <sup>1</sup>H NMR spectrum of the gossypol in CDCl<sub>3</sub> solution under different storage conditions in 1/3 days.

G-CDCl<sub>3</sub> 2 d

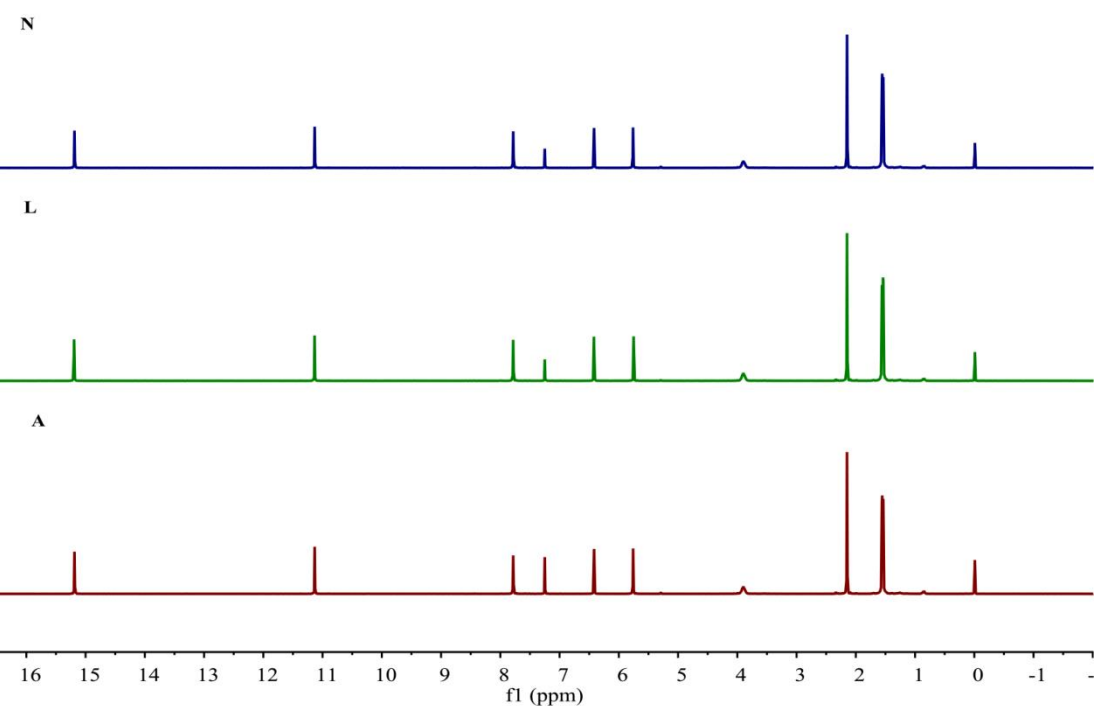

**Figure S4.** <sup>1</sup>H NMR spectrum of the gossypol in CDCl<sub>3</sub> solution under different storage conditions in 2 days.

G-CDCl<sub>3</sub> 3 d

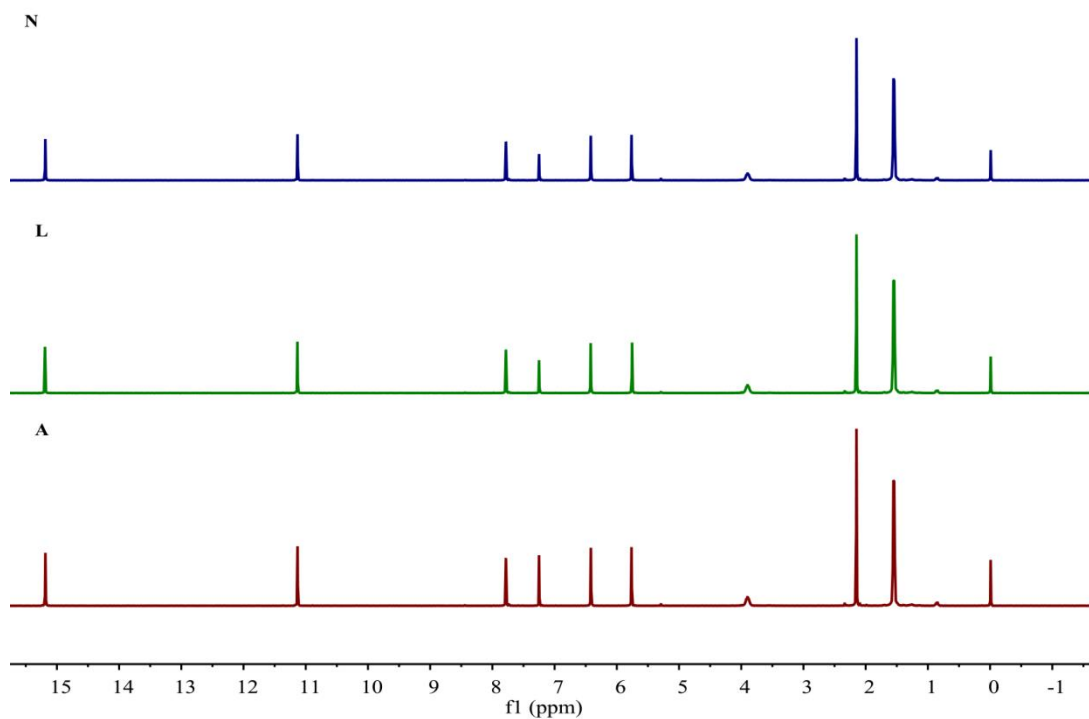

**Figure S5.** <sup>1</sup>H NMR spectrum of the gossypol in CDCl<sub>3</sub> solution under different storage conditions in 3 days.

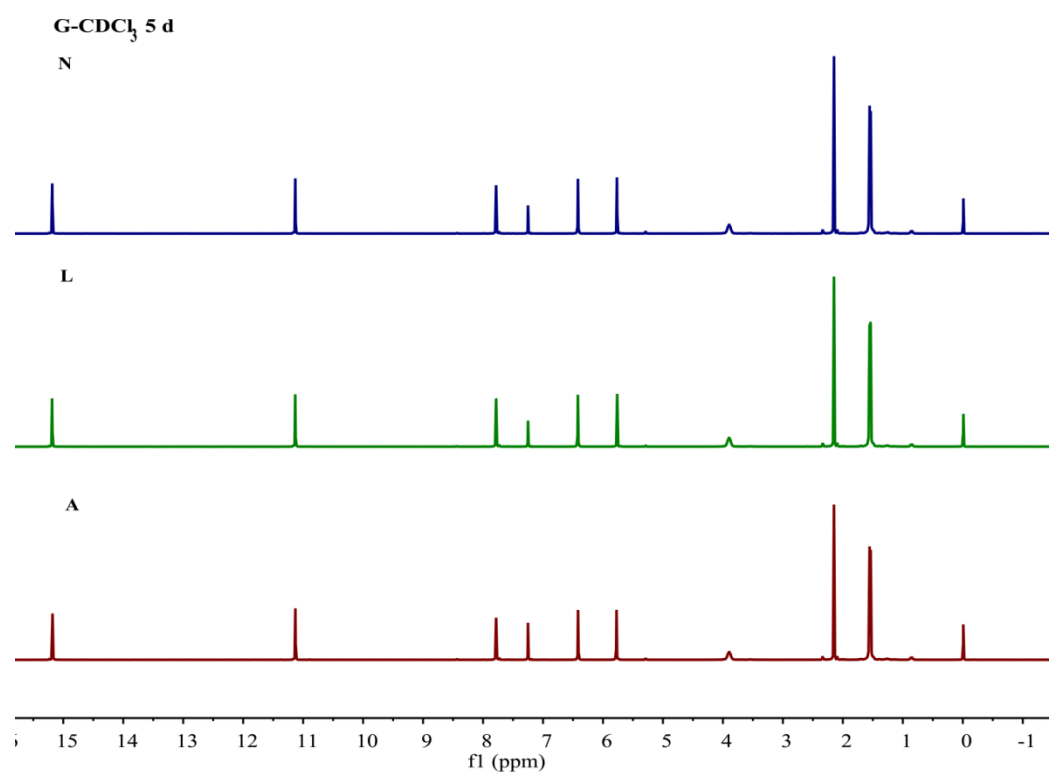

**Figure S6.** <sup>1</sup>H NMR spectrum of the gossypol in CDCl<sub>3</sub> solution under different storage conditions in 5 days.

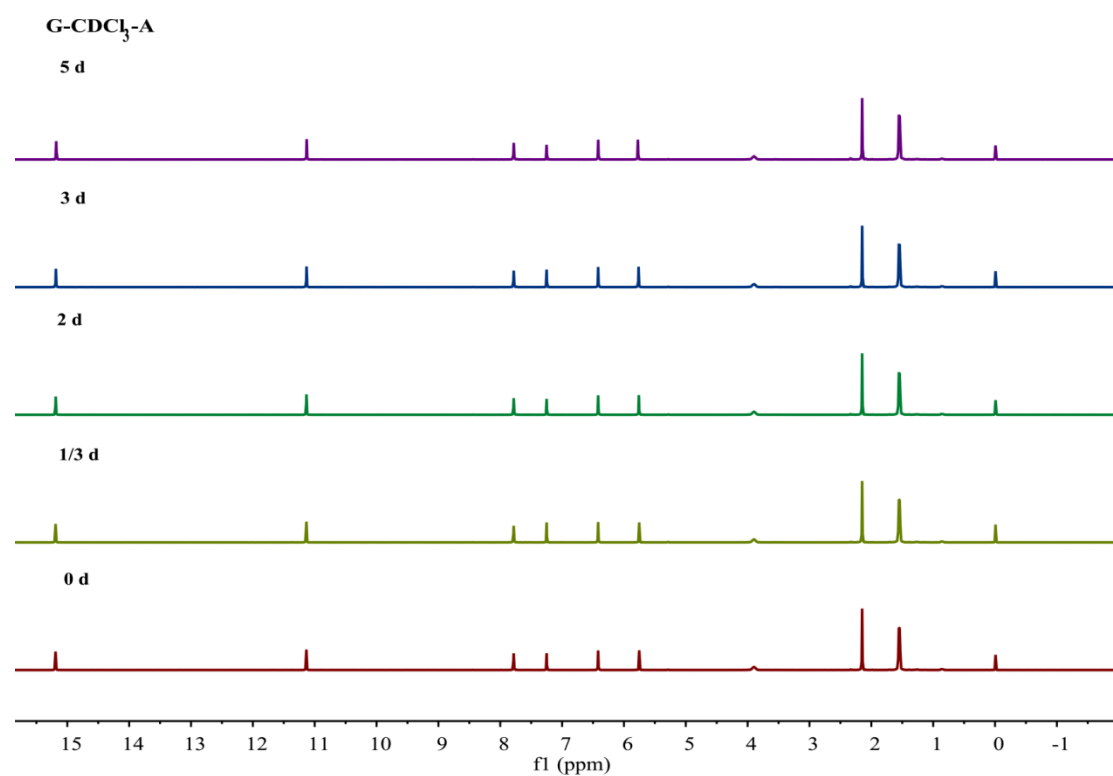

**Figure S7.** <sup>1</sup>H NMR spectrum of the gossypol in CDCl<sub>3</sub> solution under stored in dark and under nitrogen protection storage condition in different days.

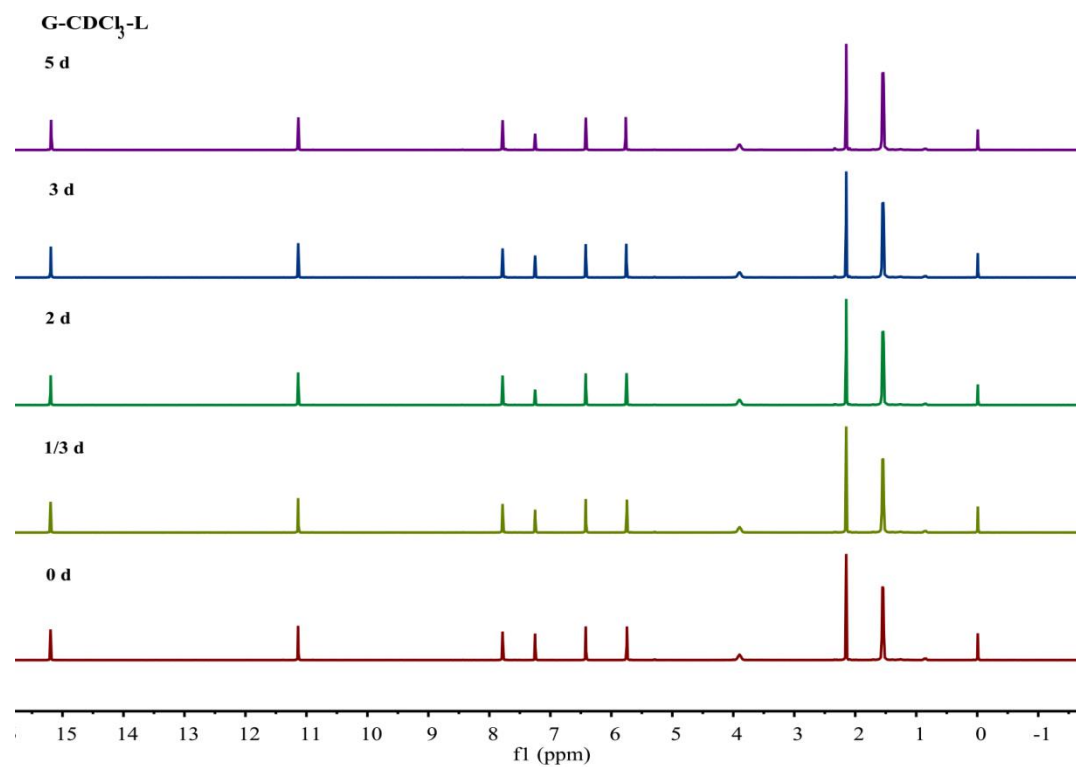

**Figure S8.** <sup>1</sup>H NMR spectrum of the gossypol in CDCl<sub>3</sub> solution under natural light and nitrogen protection storage condition in different days.

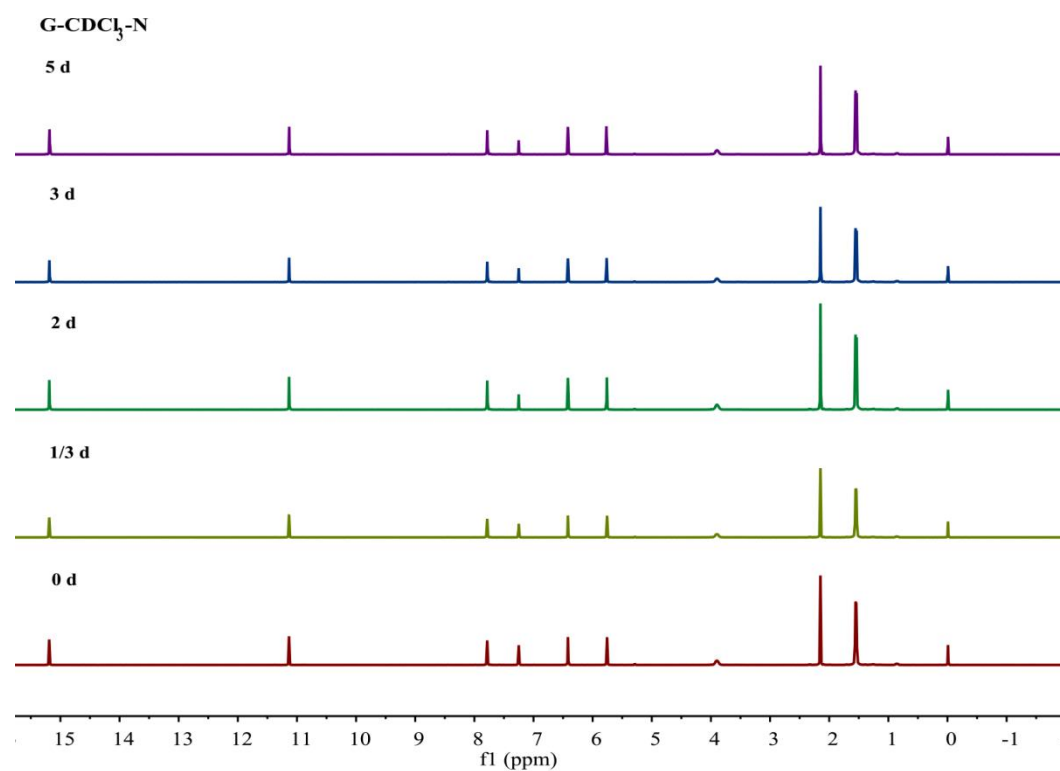

**Figure S9.** <sup>1</sup>H NMR spectrum of the gossypol in CDCl<sub>3</sub> solution under normal condition without protect from air and light storage condition in different days (0-5days).

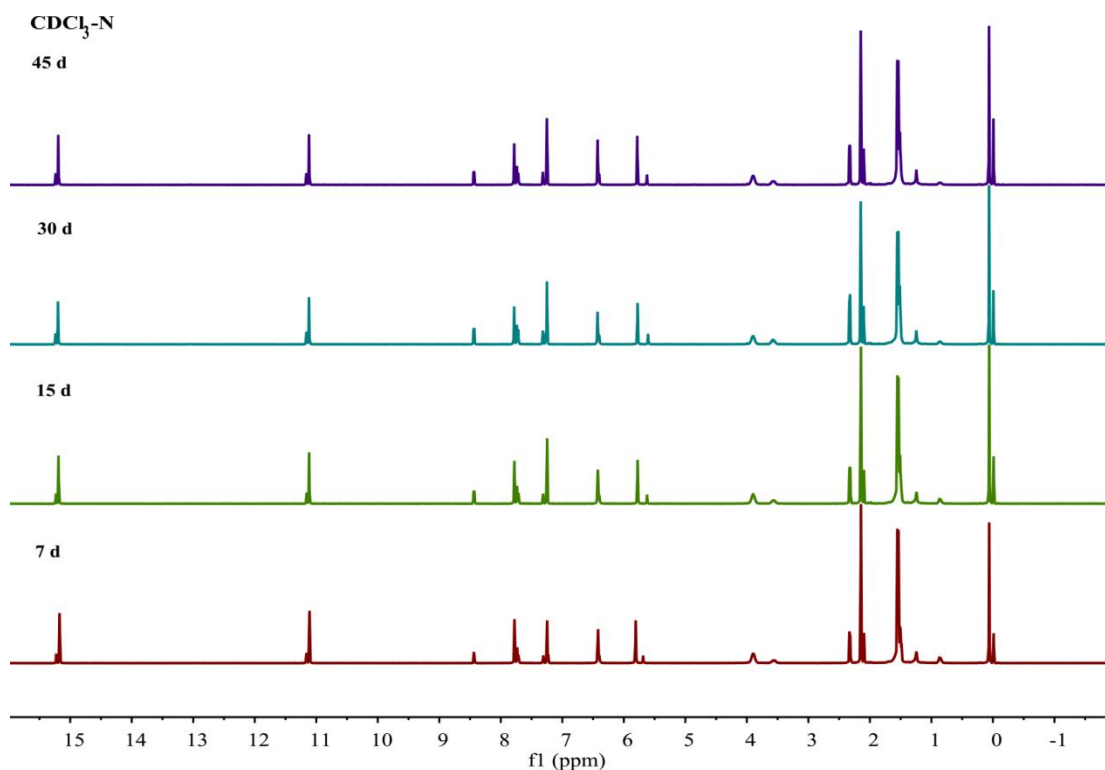

**Figure S10.** <sup>1</sup>H NMR spectrum of the gossypol in CDCl<sub>3</sub> solution under normal condition without protect from air and light storage condition in different days (7-45days).

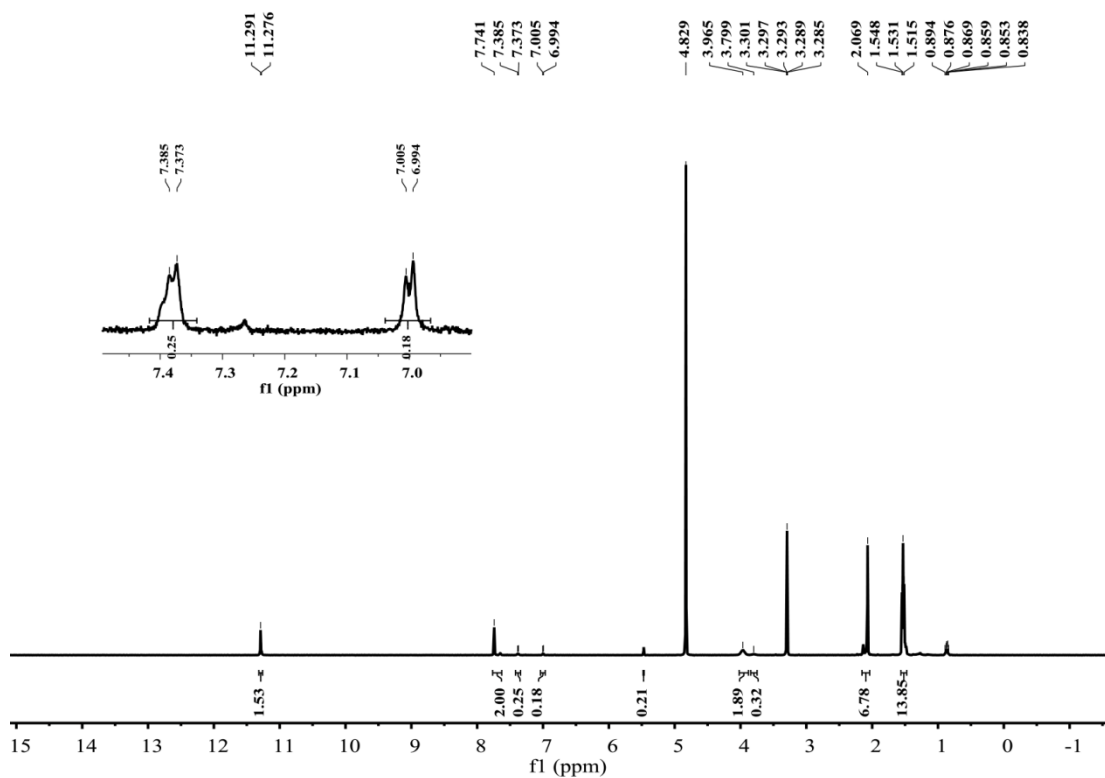

**Figure S11.** <sup>1</sup>H NMR spectrum of Gossypol-CD<sub>3</sub>OD fresh solution under normal condition without protect from air and light storage condition.

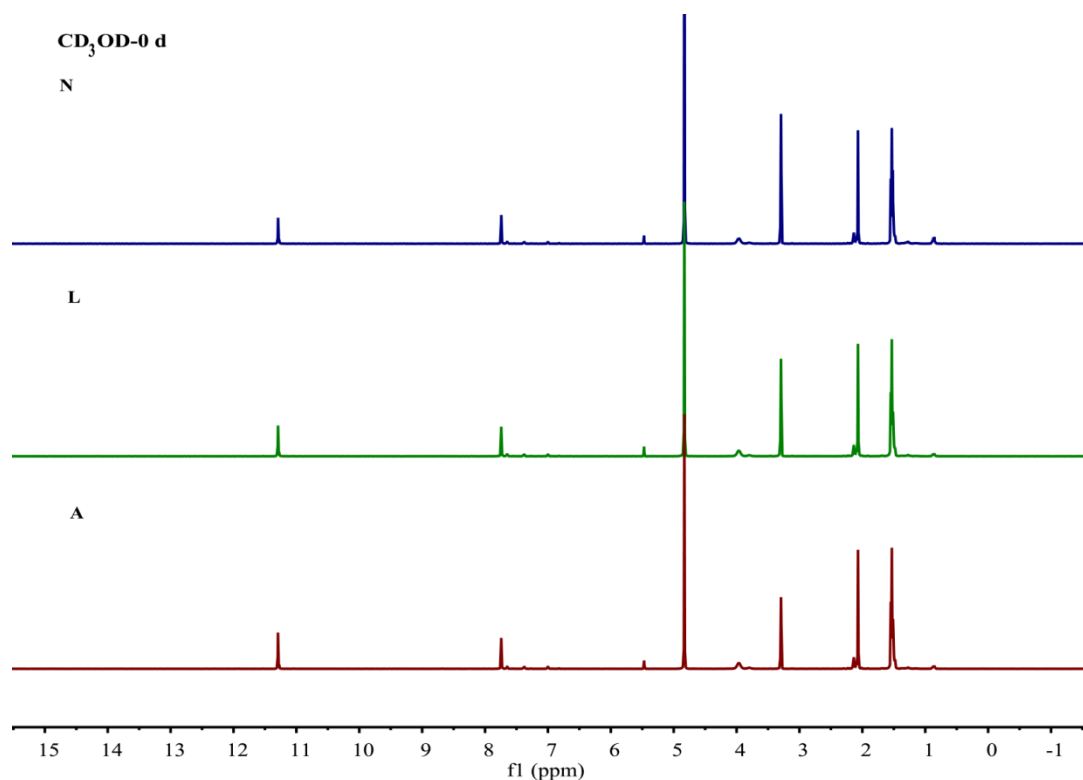

**Figure S12.** <sup>1</sup>H NMR spectrum of the gossypol in CD<sub>3</sub>OD solution under different storage conditions in 0 day (N: normal condition without protecting from air and light; L: under natural light and nitrogen protection; A: stored in dark and under nitrogen protection condition).

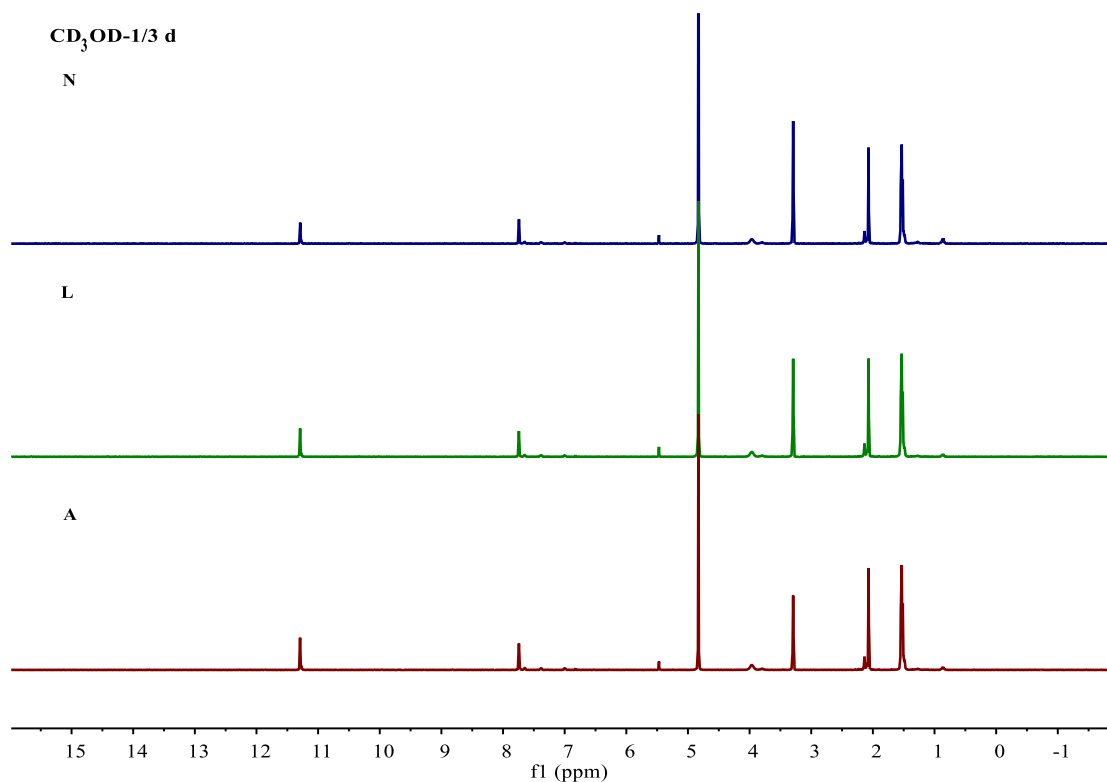

**Figure S13.** <sup>1</sup>H NMR spectrum of the gossypol in CD<sub>3</sub>OD solution under different storage conditions in 1/3 days.



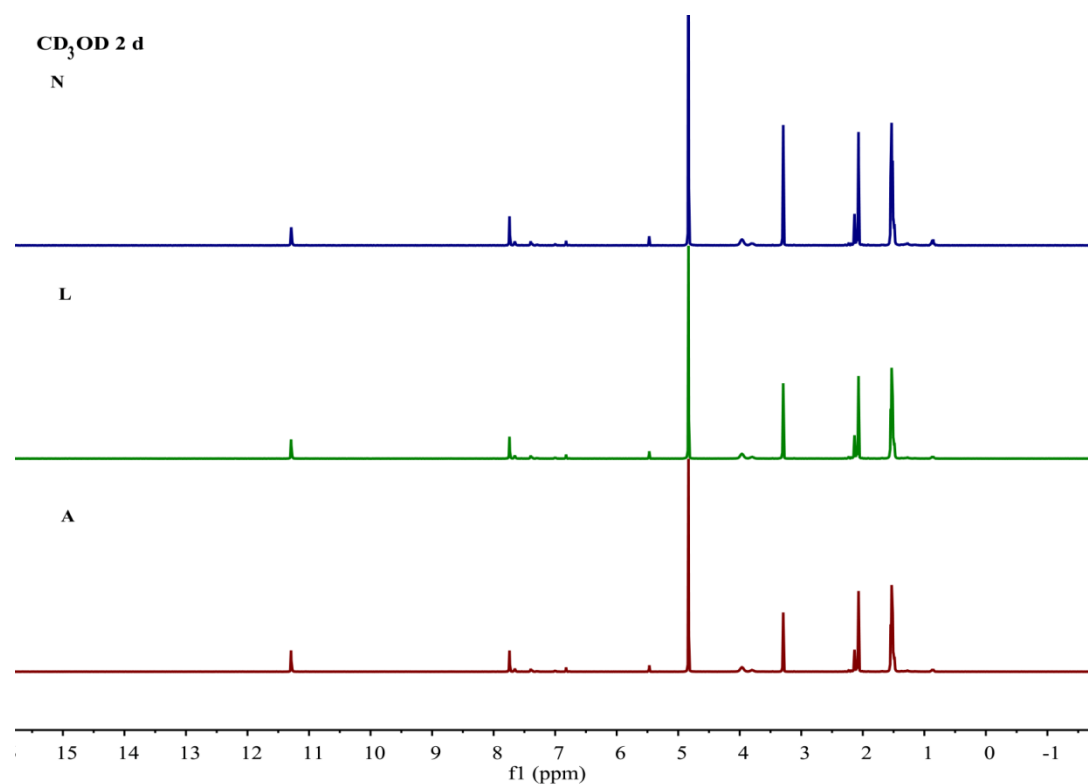

**Figure S14.** <sup>1</sup>H NMR spectrum of the gossypol in CD<sub>3</sub>OD solution under different storage conditions in 2 days.

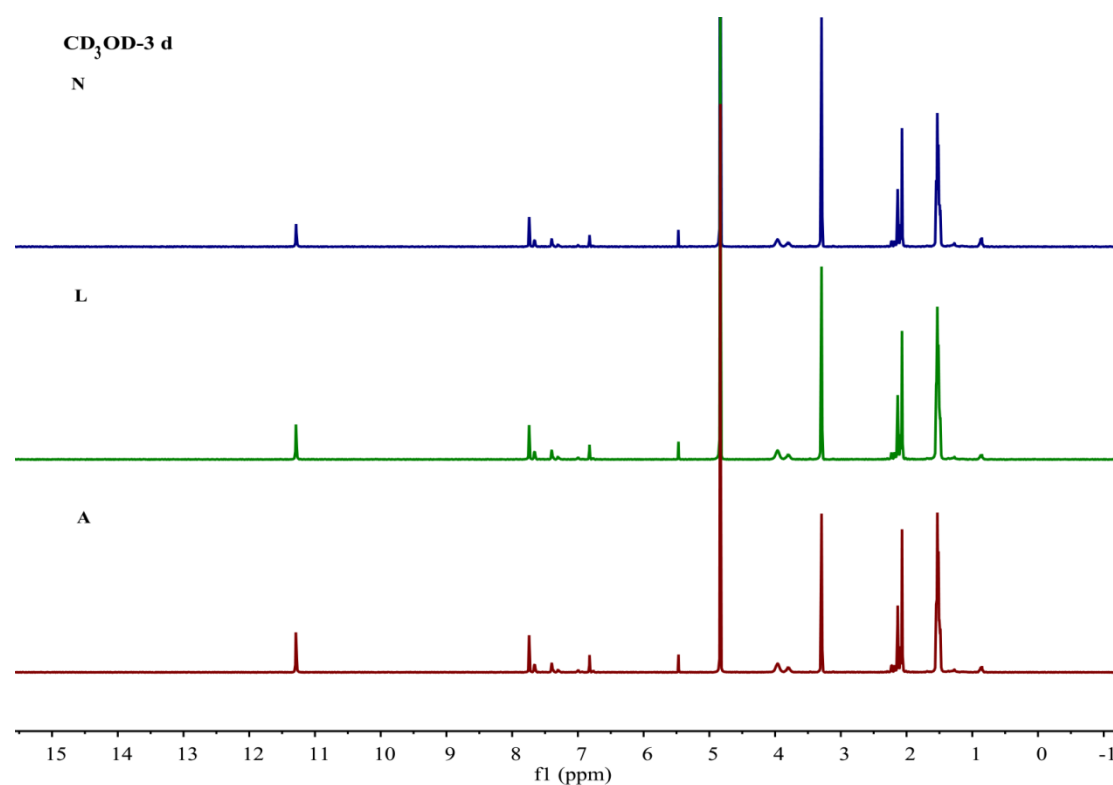

**Figure S15.** <sup>1</sup>H NMR spectrum of the gossypol in CD<sub>3</sub>OD solution under different storage conditions in 3 days.

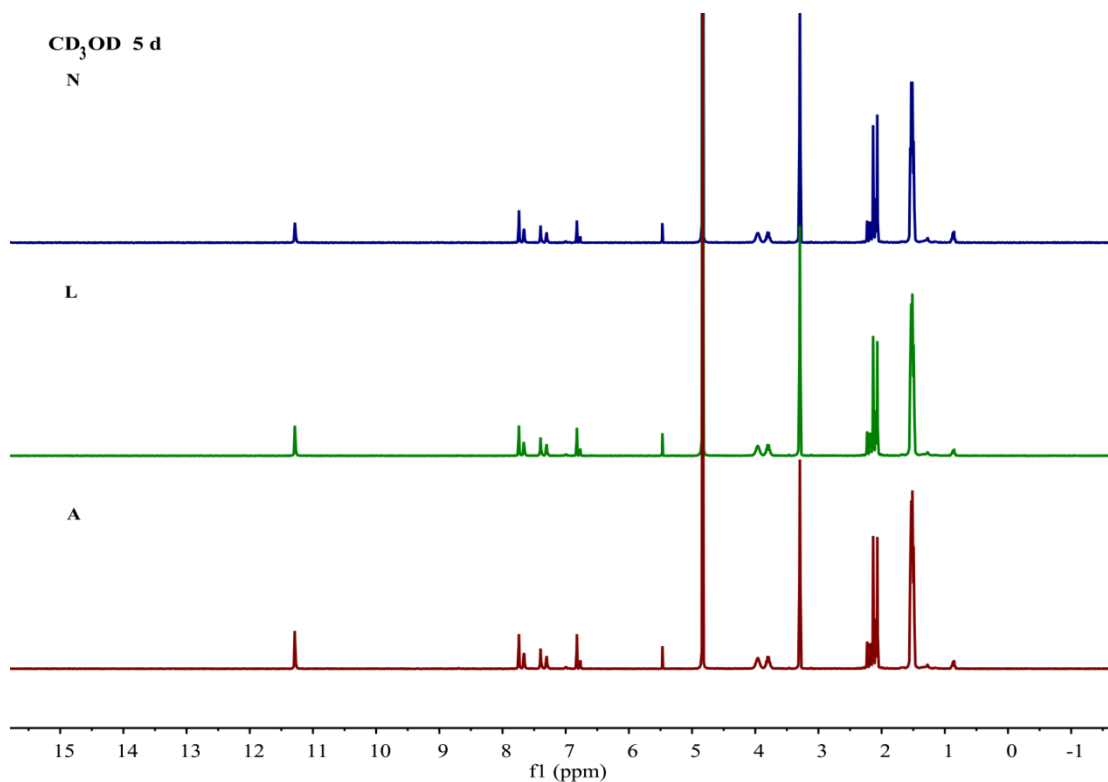

**Figure S16.** <sup>1</sup>H NMR spectrum of the gossypol in CD<sub>3</sub>OD solution under different storage conditions in 5 days.

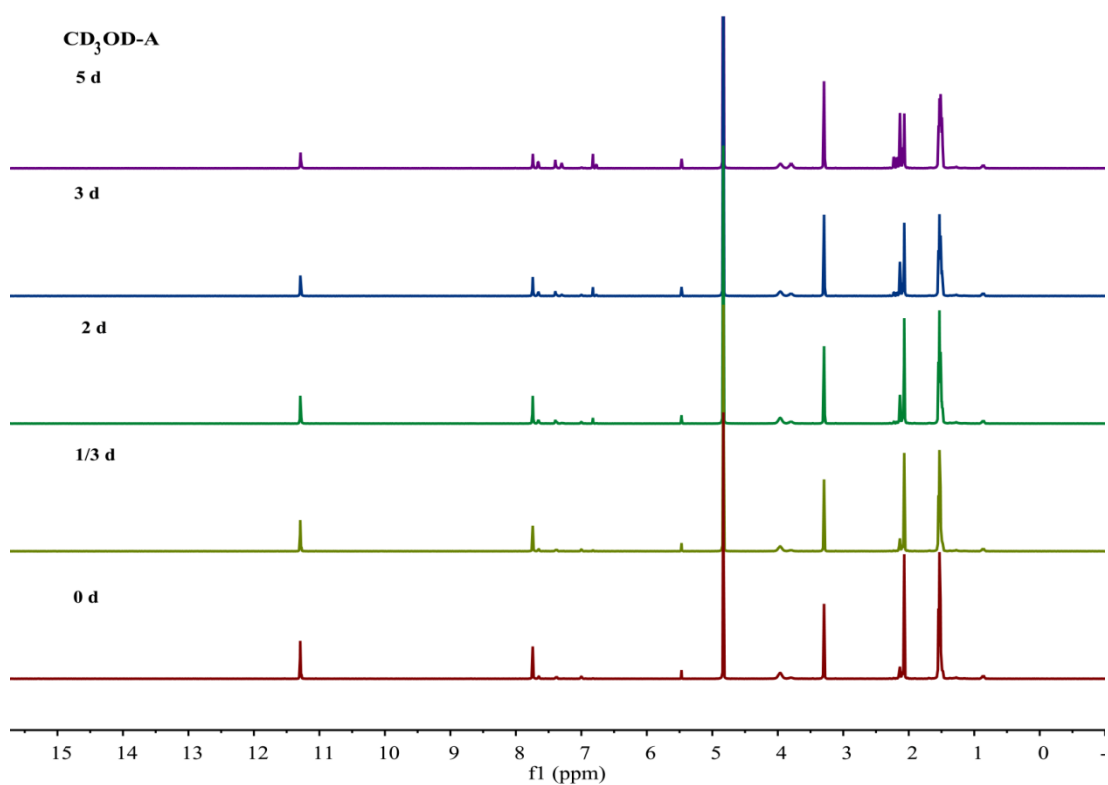

**Figure S17.** <sup>1</sup>H NMR spectrum of the gossypol in CD<sub>3</sub>OD solution under stored in dark and under nitrogen protection condition storage condition in different days.

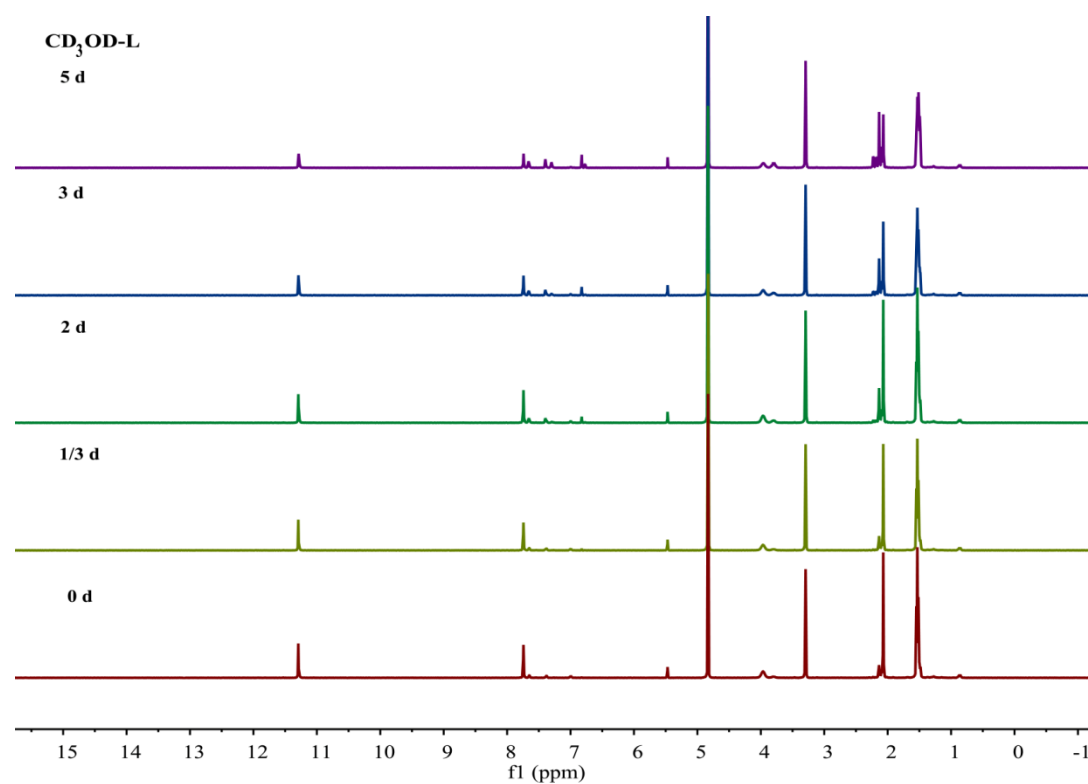

**Figure S18.**  $^1\text{H}$  NMR spectrum of the gossypol in  $\text{CD}_3\text{OD}$  solution under natural light and nitrogen protection storage condition in different days.

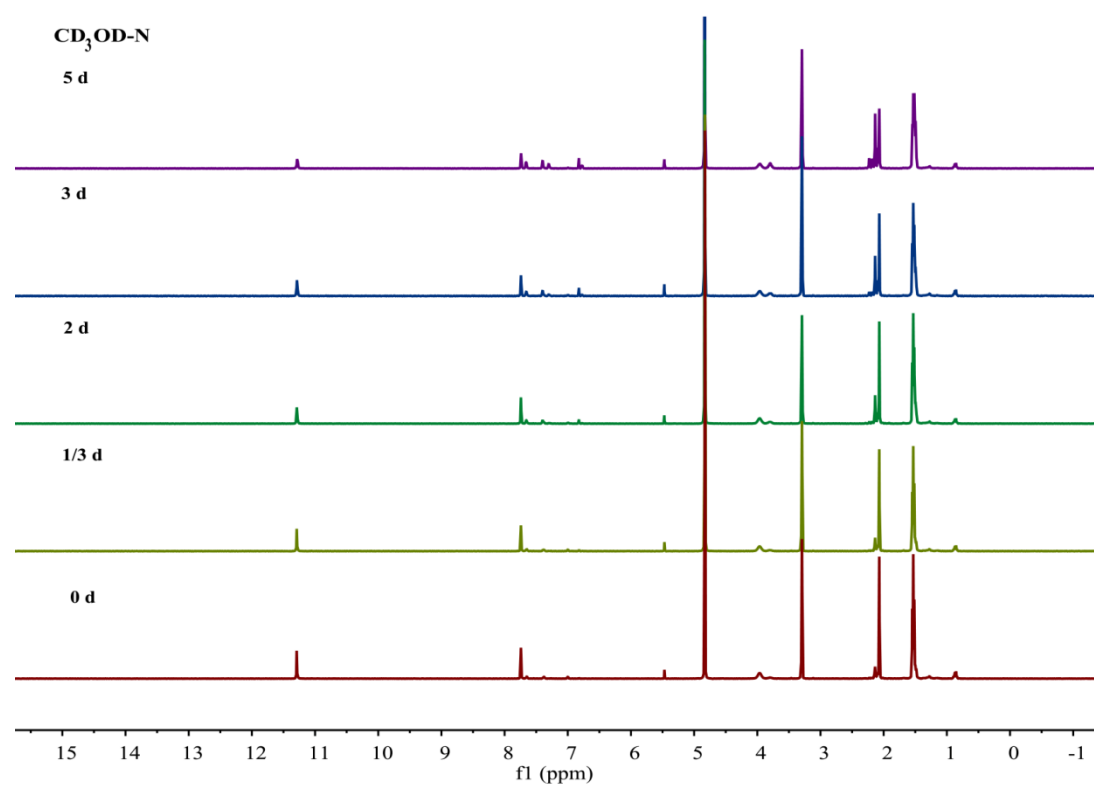

**Figure S19.**  $^1\text{H}$  NMR spectrum of the gossypol in  $\text{CD}_3\text{OD}$  solution under normal condition without protect from air and light storage condition in different days (0-5 days).

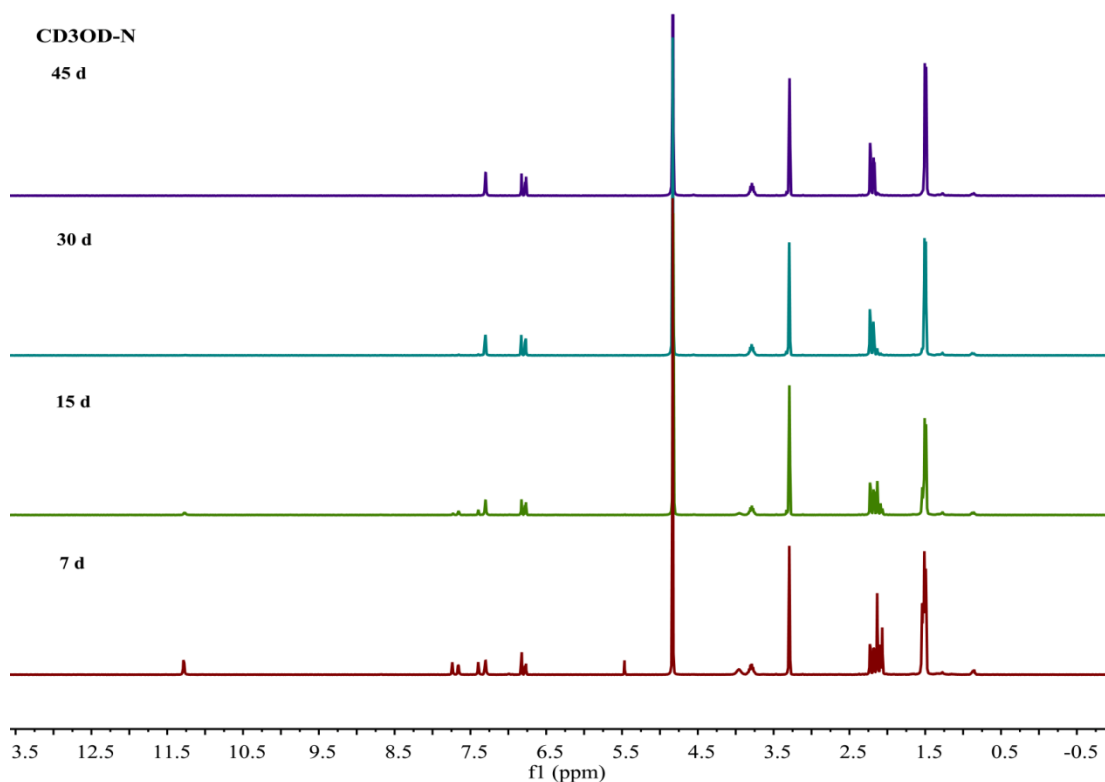

**Figure S20.** <sup>1</sup>H NMR spectrum of the gossypol in CD<sub>3</sub>OD solution under normal condition without protect from air and light storage condition in different days (7-45 days).

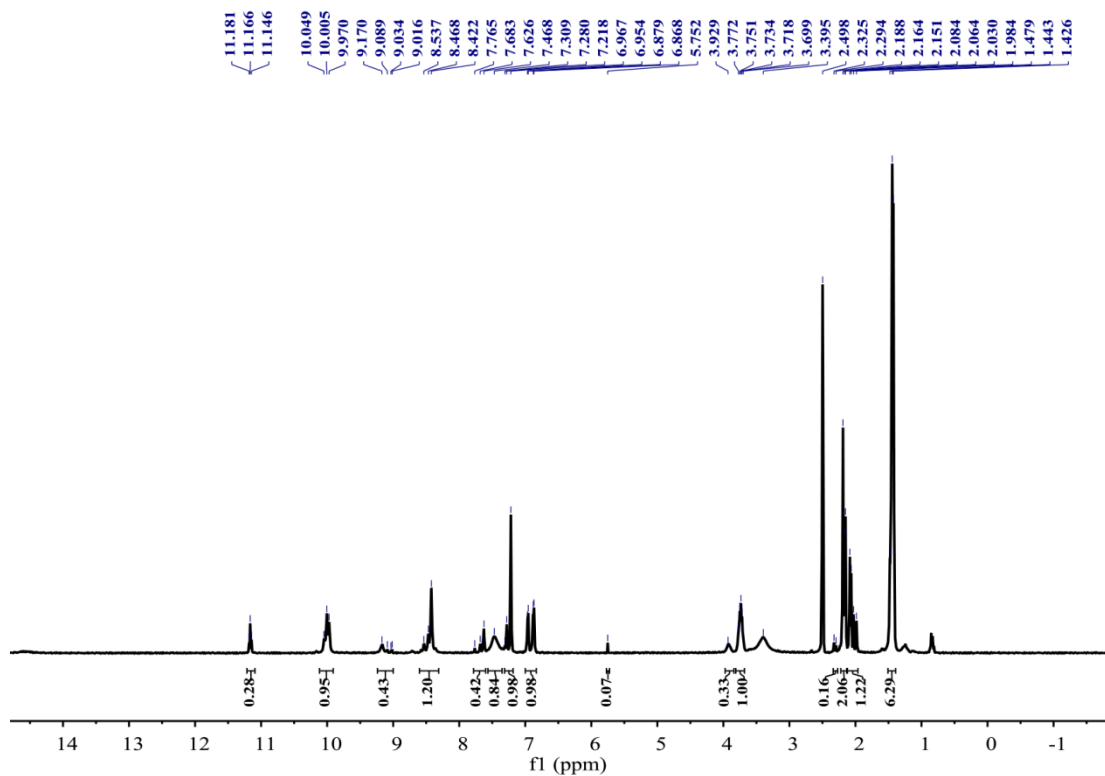

**Figure S21.** <sup>1</sup>H NMR spectrum of Gossypol- DMSO-*d*<sub>6</sub> fresh solution under normal condition without protect from air and light storage condition.

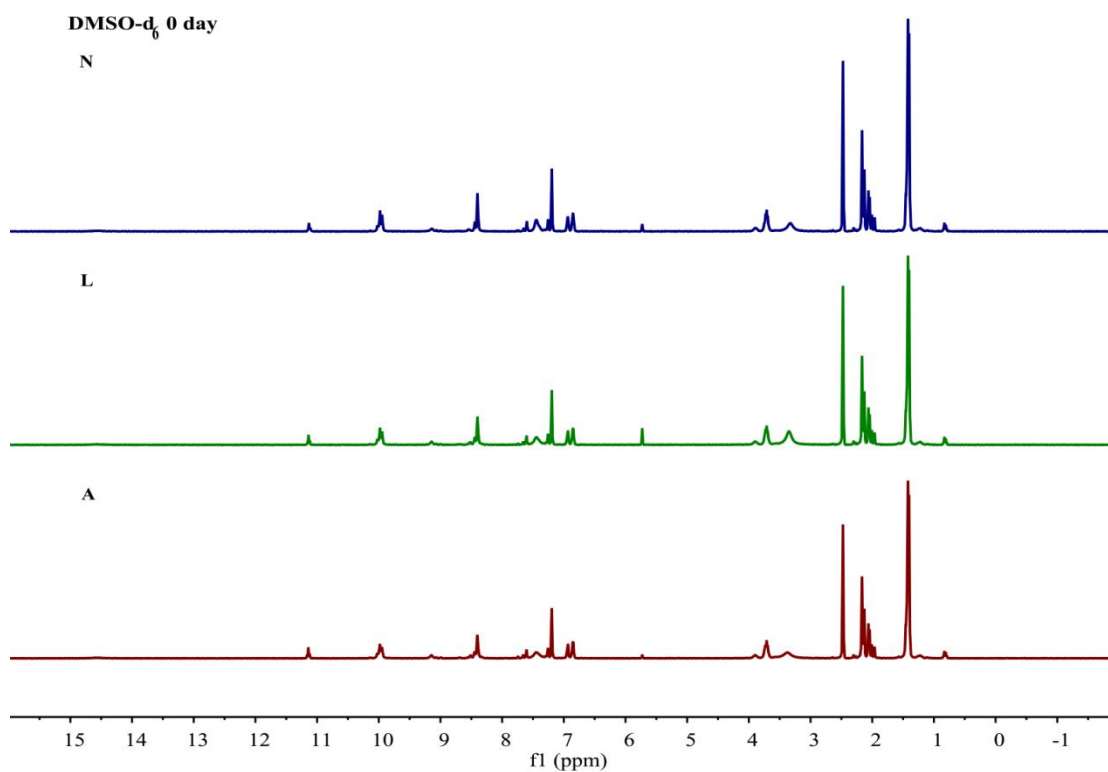

**Figure S22.**  $^1\text{H}$  NMR spectrum of the gossypol in DMSO- $\text{d}_6$  solution under different storage conditions in 0 day (N: normal condition without protecting from air and light; L: under natural light and nitrogen protection; A: stored in dark and under nitrogen protection condition).

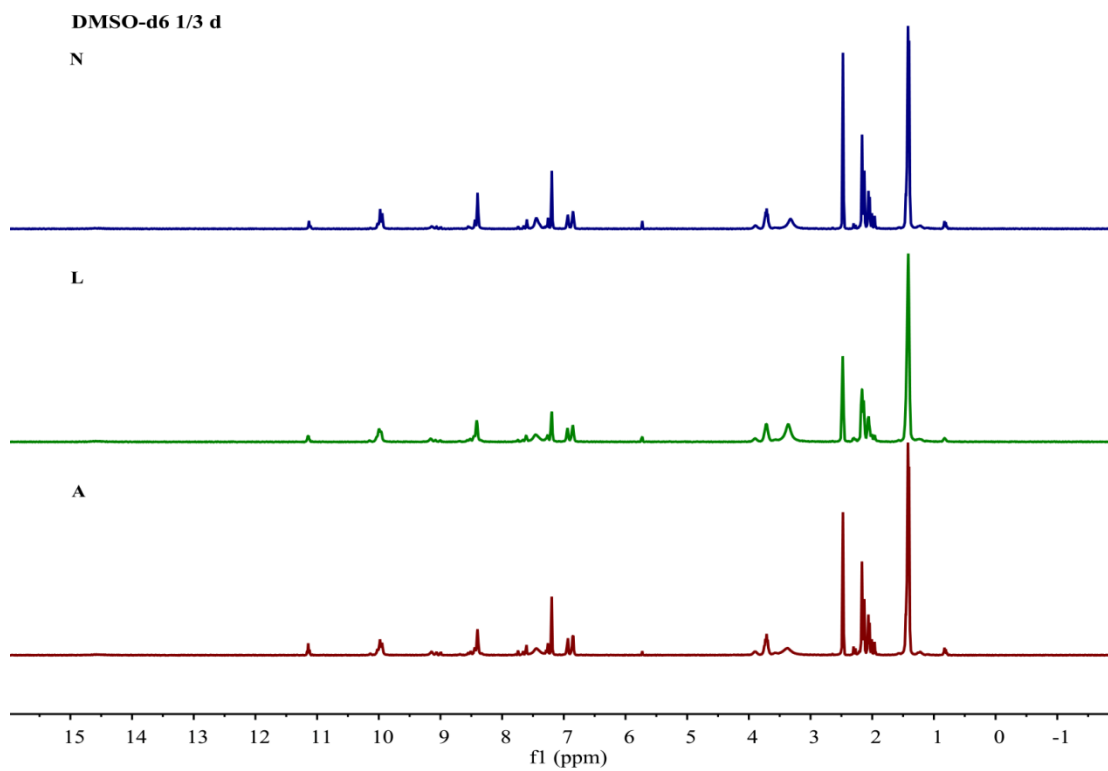

**Figure S23.**  $^1\text{H}$  NMR spectrum of the gossypol in DMSO- $\text{d}_6$  solution under different storage conditions in 1/3 days.

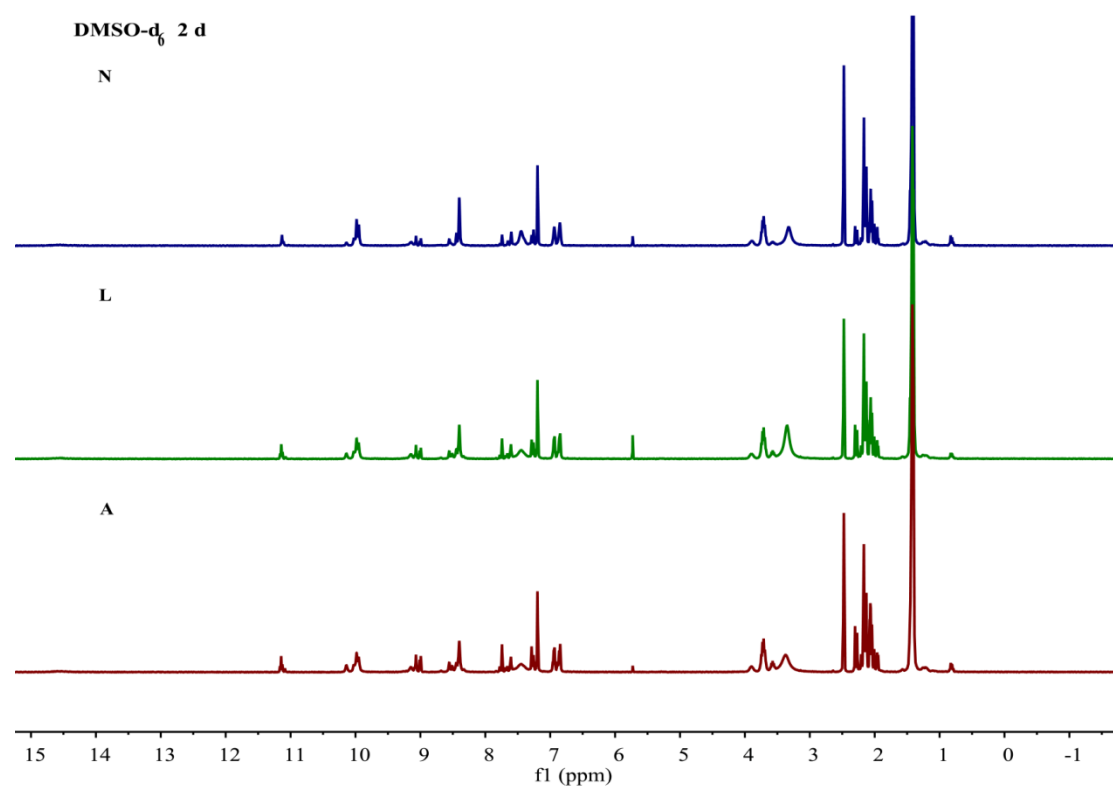

**Figure S24.**  $^1\text{H}$  NMR spectrum of the gossypol in DMSO-d<sub>6</sub> solution under different storage conditions in 2 days.

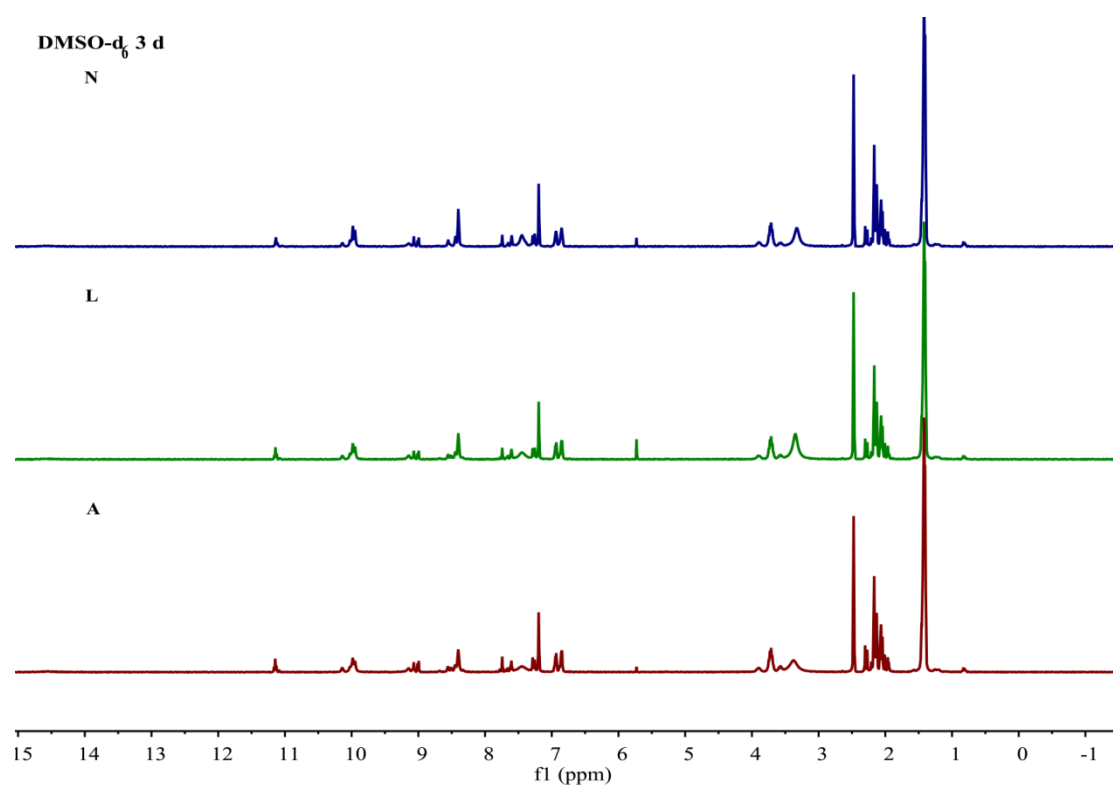

**Figure S25.**  $^1\text{H}$  NMR spectrum of the gossypol in DMSO-d<sub>6</sub> solution under different storage conditions in 3 days.

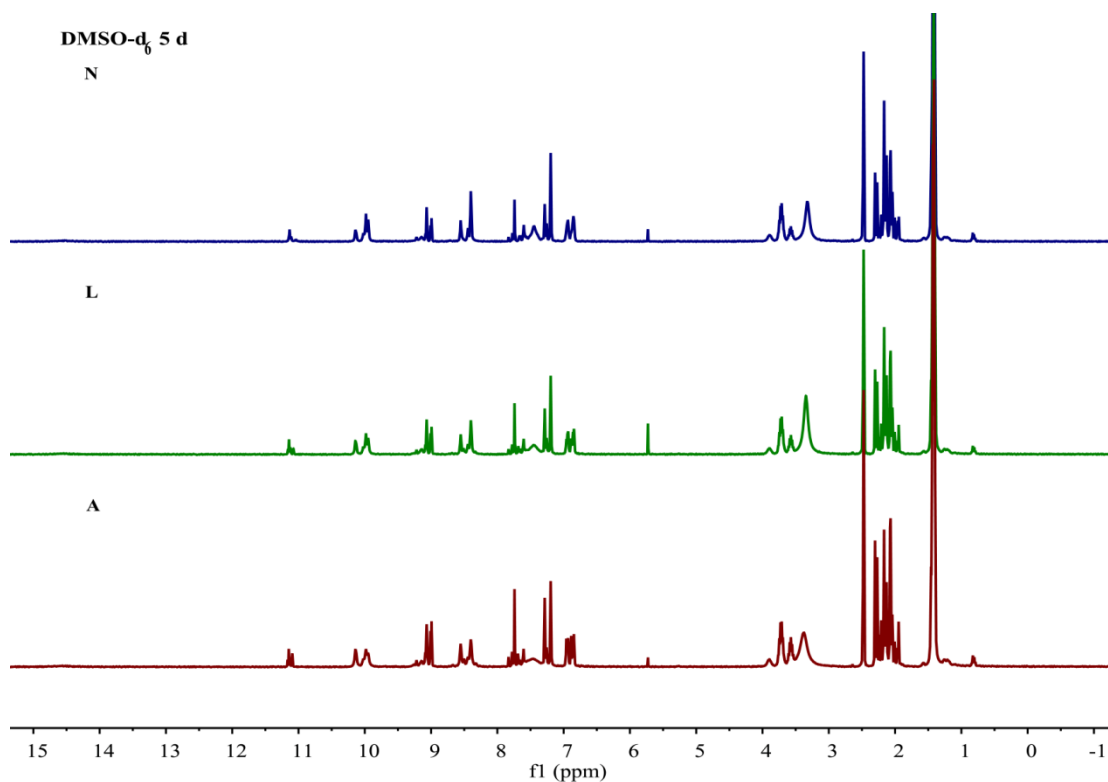

**Figure S26.**  $^1\text{H}$  NMR spectrum of the gossypol in DMSO-d<sub>6</sub> solution under different storage conditions in 5 days.

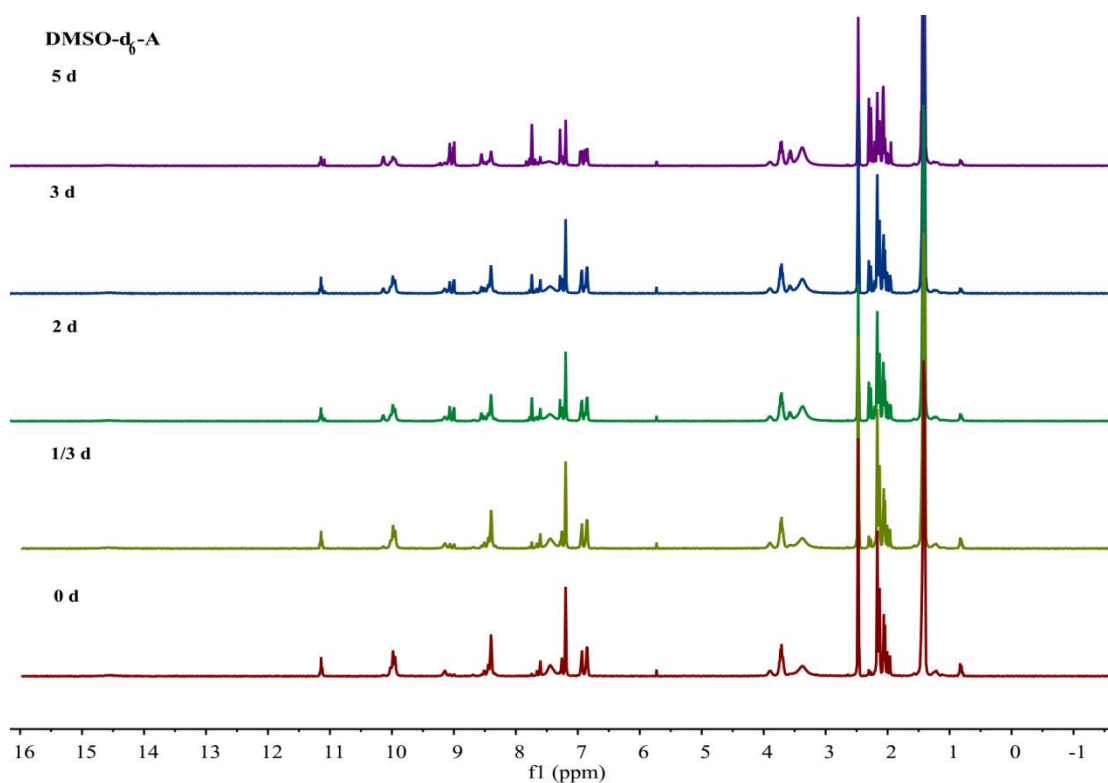

**Figure S27.**  $^1\text{H}$  NMR spectrum of the gossypol in DMSO-d<sub>6</sub> solution under stored in dark and under nitrogen protection condition storage condition in different days.

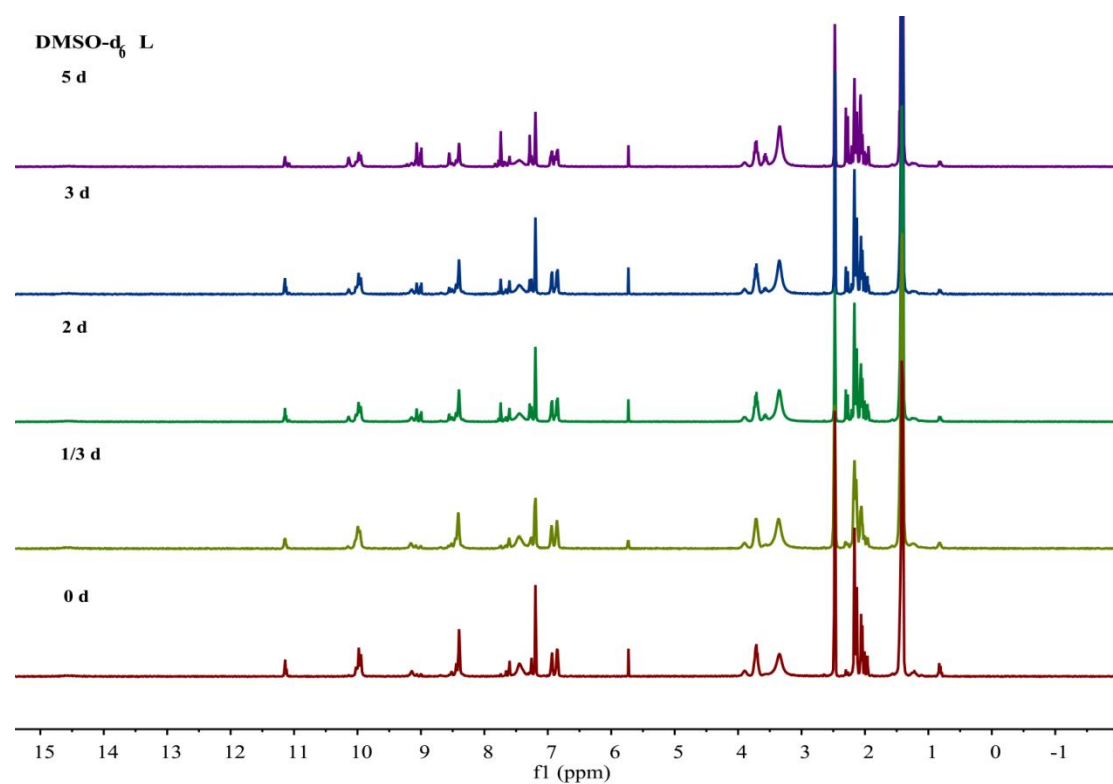

**Figure S28.H**  $^1\text{H}$  NMR spectrum of the gossypol in  $\text{DMSO-d}_6$  solution under natural light and nitrogen protection storage condition in different days.

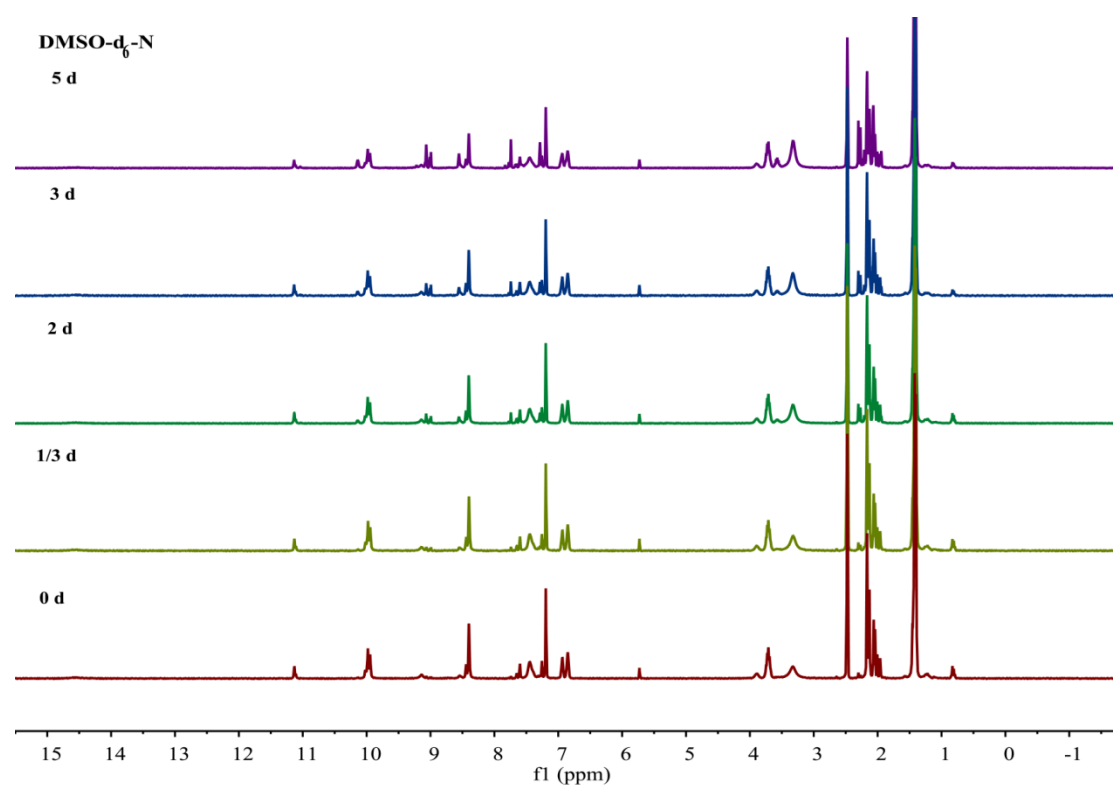

**Figure S29.**  $^1\text{H}$  NMR spectrum of the gossypol in  $\text{DMSO-d}_6$  solution under normal condition without protect from air and light storage condition in different days (0-5 days).



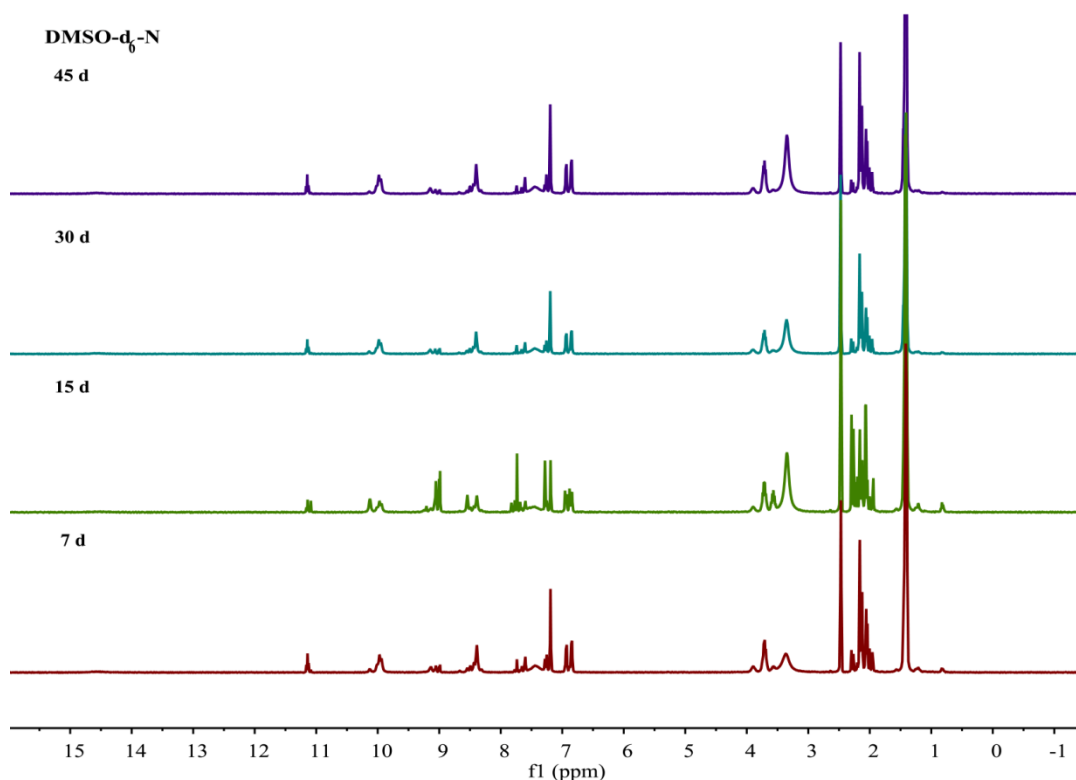

**Figure S30.**  $^1\text{H}$  NMR spectrum of the gossypol in  $\text{DMSO-d}_6$  solution under normal condition without protect from air and light storage condition in different days (7-45 days).

## 2. UV-Vis absorbance spectra of Gossypol solutions.

Sample Preparation for UV-Vis absorbance spectra Analysis: 5.0 mg of gossypol was dissolved in 1.0 mL of menthol, chloroform, and Methyl sulfoxide in a screw-capped vial respectively. The samples were stored under normal condition without protecting from light and air for 0 days, 3 days, 5 days, 7days, 15 days, 30 days and 45 days at room temperature and UV-Vis measurements were taken at different time intervals.

UV-Vis measurements were taken with Shimadzu UV-2600 double-beam UV-Vis spectrophotometer equipped with 10-mm quartz absorption cells. The spectrums of the Gossypol solutions samples were recorded in the wavelength range 200-600nm.

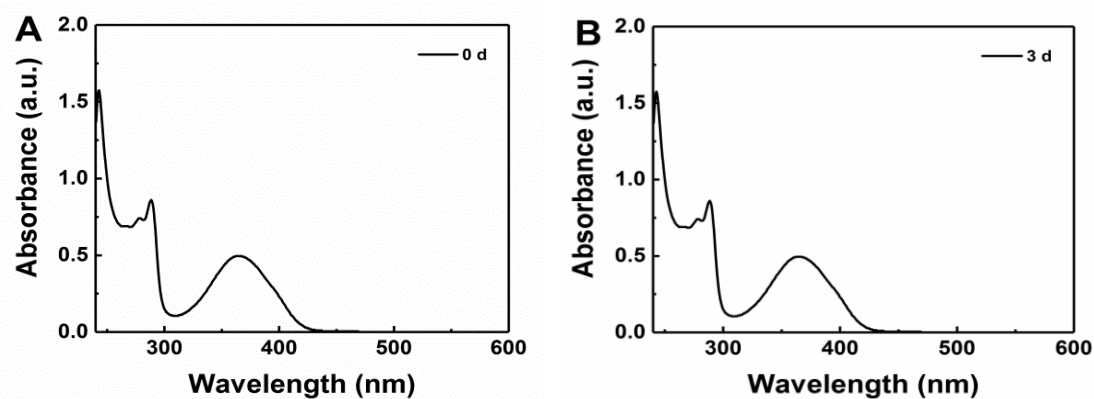

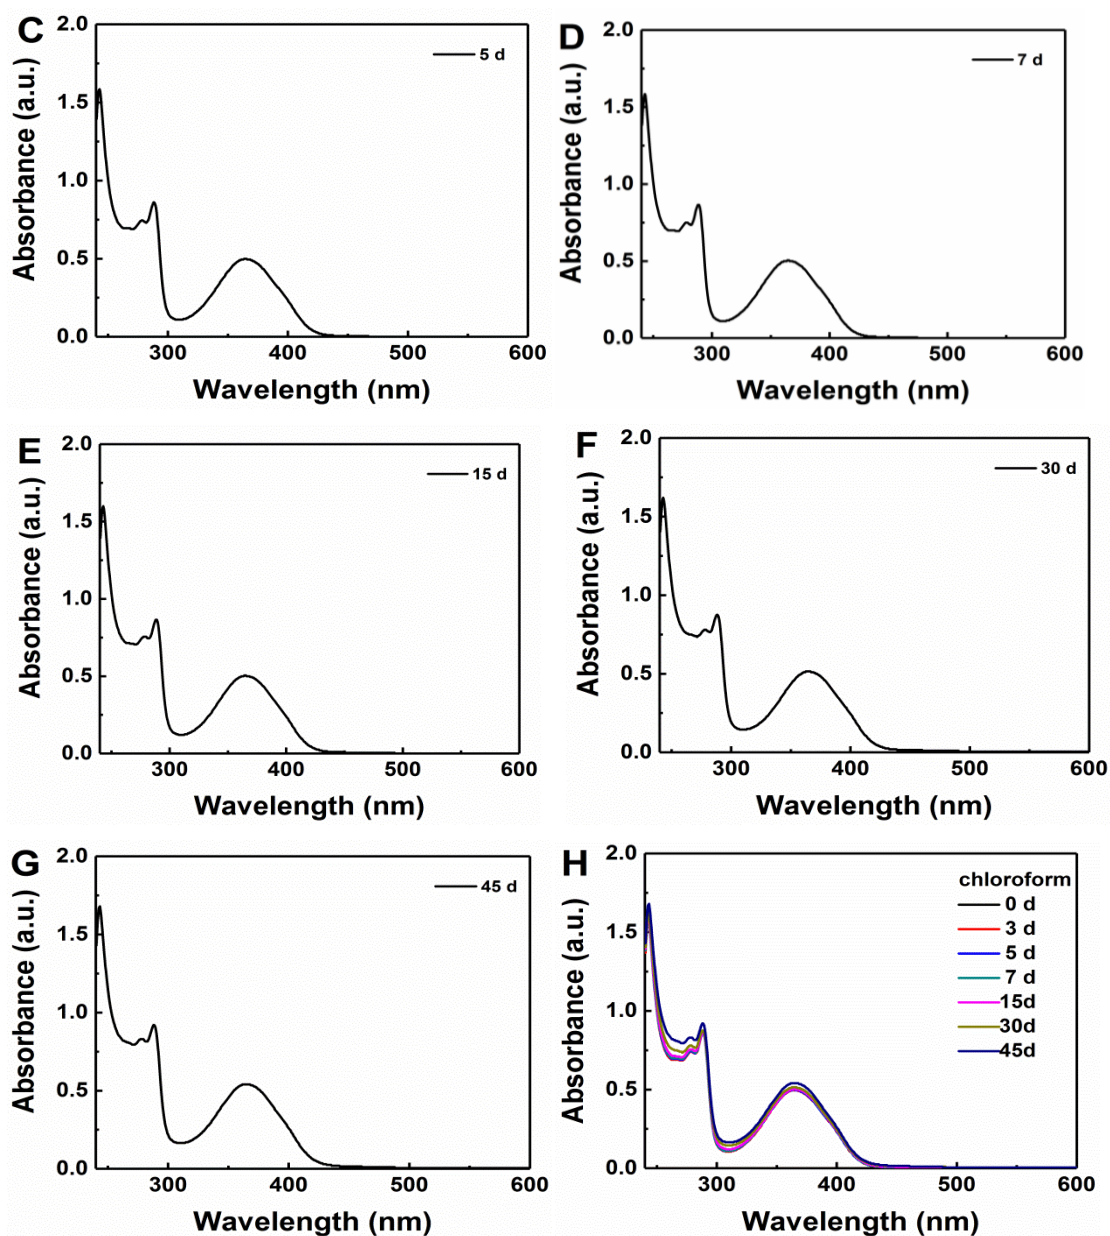

**Figure S31.** UV-VIS absorbance spectra of gossypol in  $\text{CHCl}_3$  solvent under normal condition without protect from air and light storage condition (A) for 0 day (B) for 3 days (C) for 5 days (D) for 7 days (E) for 15 days (F) for 30 days (G) for 45 days (H) for different days

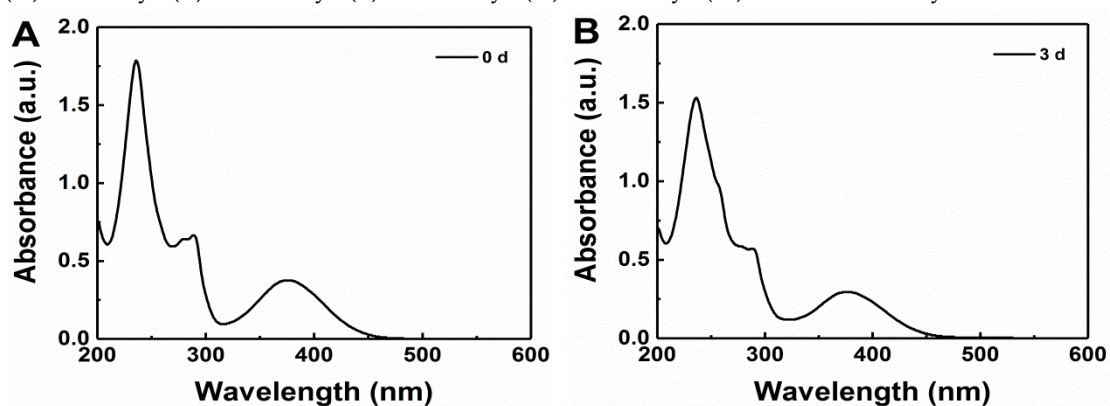

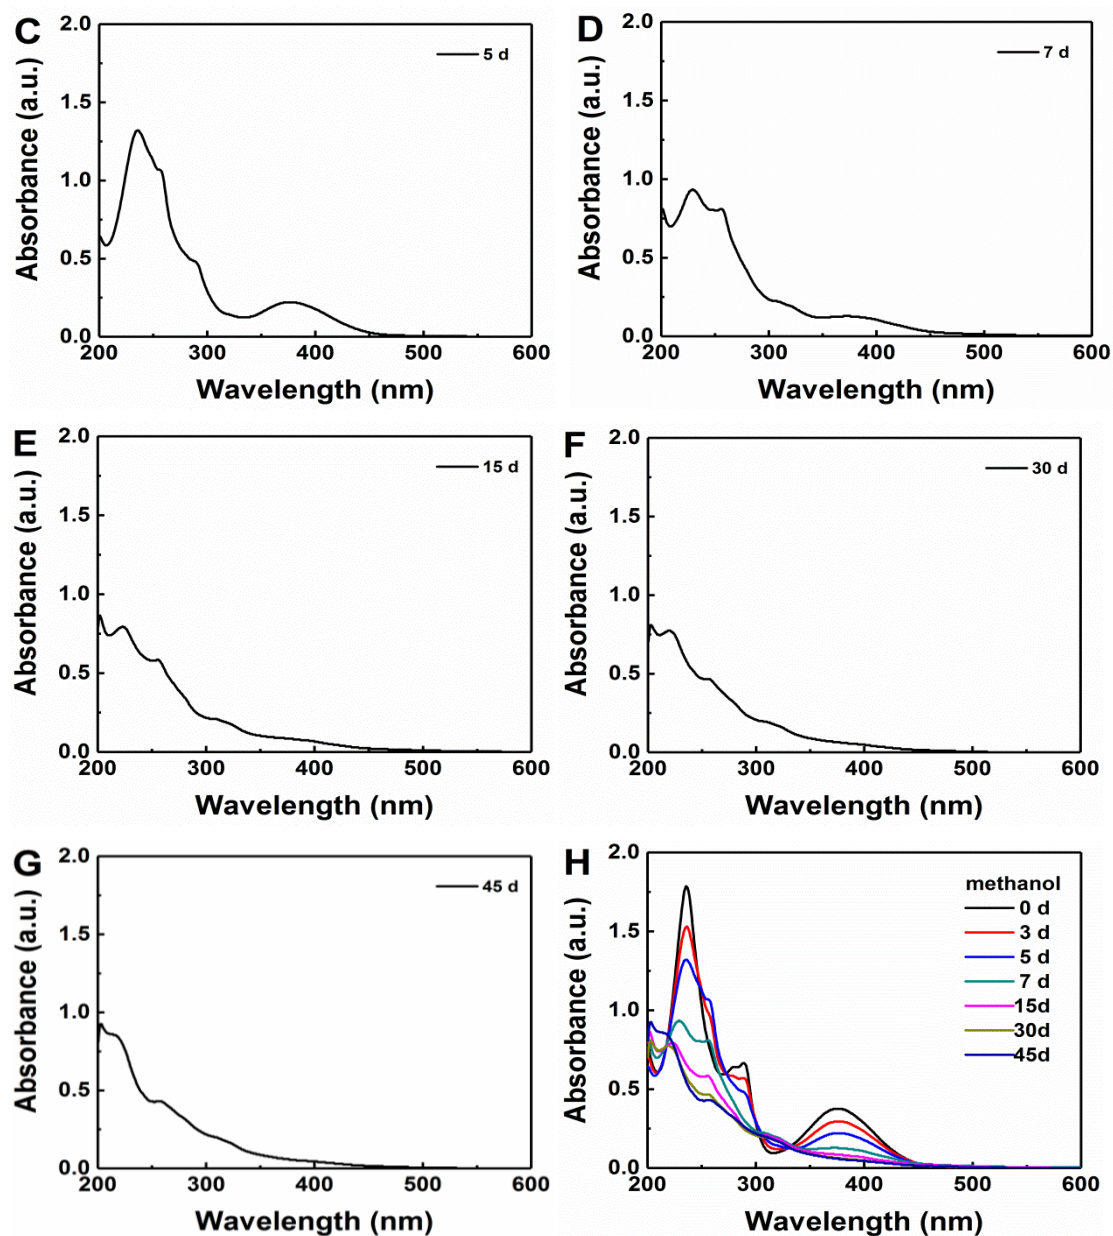

**Figure S32.** UV-VIS absorbance spectra of gossypol in  $\text{CH}_3\text{OH}$  solvent under normal condition without protect from air and light storage condition (a) for 0 day (b) for 3 days (c) for 5 days (d) for 7 days (e) for 15 days (f) for 30 days (g) for 45 days (h) for different days.

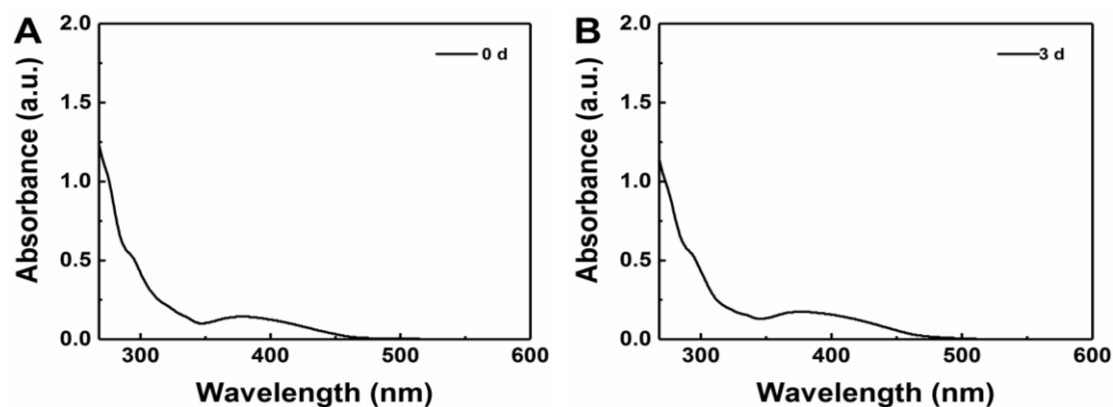

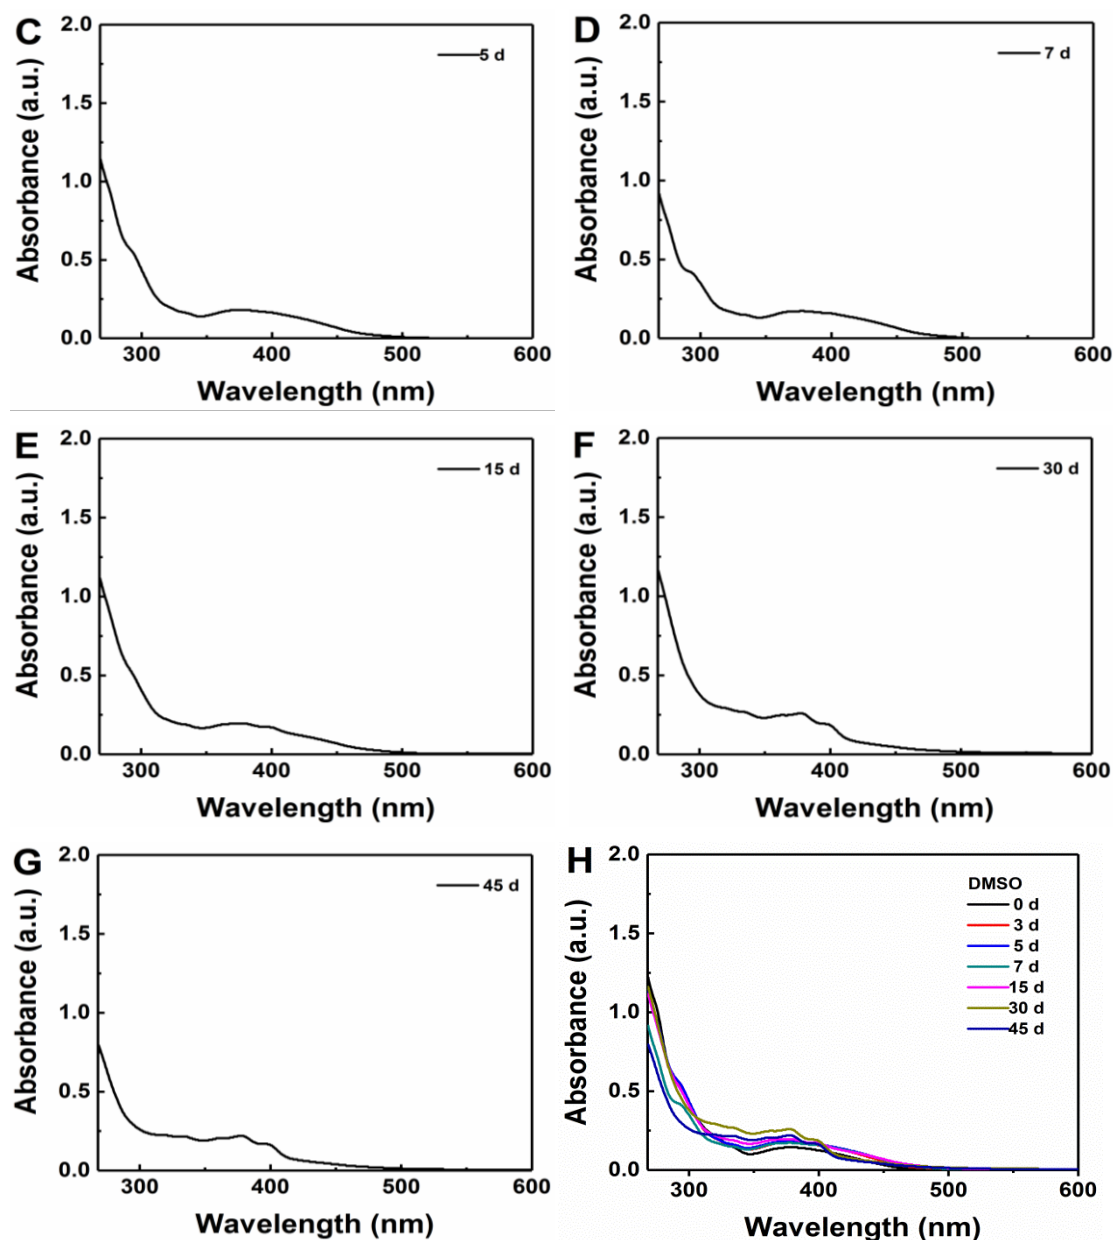

**Figure S33.** UV-VIS absorbance spectra of gossypol in DMSO solvent under ambient air storage condition (a) for 0 day (b) for 3 days (c) for 5 days (d) for 7 days (e) for 15 days (f) for 30 days (g) for 45 days (h) for different days

### 3. ATR-FTIR spectra of Gossypol solutions

Sample Preparation for FT-IR spectra Analysis: 5.0 mg of gossypol was dissolved in 1.0 mL of menthol, chloroform, and Methyl sulfoxide in a screw-capped vial respectively. The samples were stored under normal condition without protecting from light and air for 0 days, 3 days, 5 days, 7 days, 15 days, 30 days and 45 days at room temperature and gossypol solution was dropwise added into the ATR attachment (ZnSe crystal), then spectra of the gossypol was measurement by ATR-IR after the solution evaporated at room temperature.

Attenuated Total Reflectance Fourier Transform Infrared spectra were obtained with Nicolet 6700 Recording Infrared Spectrophotometer. The temperature of the instrument was maintained at  $25 \pm 1^\circ\text{C}$  by water circulating from a constant temperature bath.

The ATR-FTIR spectra of gossypol in chloroform and in methanol over 45 days at room temperature were compared in Figure S34, S35 and S36. The spectra of the gossypol in



chloroform and in methanol were comparable in the region below 2000  $\text{cm}^{-1}$  but showed significantly different above this wave number, especially in the region of 3700-3000  $\text{cm}^{-1}$ . These signals were due to the  $\nu(\text{OH})$  vibrations.

The spectra of gossypol in KBr and gossypol in methanol revealed broad bands of  $\nu(\text{OH})$  vibrations in the region of 3700-3000  $\text{cm}^{-1}$ . The spectra of gossypol in KBr showed three bands at 3514, 3421 and 3308  $\text{cm}^{-1}$  which were assigned to hydroxyl groups involved in the hydrogen bonds of different strength.

In the spectrum of gossypol in methanol, the band assigned to the  $\nu(\text{OH})$  stretching vibrations shifted to ca. 3490  $\text{cm}^{-1}$  (3496  $\text{cm}^{-1}$  for 15 days, 3482  $\text{cm}^{-1}$  for 30 days and 45 days) relative to the band at ca. 3500 and 3400  $\text{cm}^{-1}$  in the spectrum of gossypol for 0 day, 3 days, 5 days and 7 days (3519 and 3393  $\text{cm}^{-1}$  for 0 day, 3494 and 3396  $\text{cm}^{-1}$  for 3 days, 3675 and 3495  $\text{cm}^{-1}$  for 5 days, 3501 and 3419  $\text{cm}^{-1}$  for 7 days). The broad band assigned to the stretching vibrations of OH groups at the 7, 7' positions and to the stretching vibrations of  $\text{C}_{15}\text{-OH}$  and  $\text{C}_{15'}\text{-OH}$  groups showed in ca. 3490  $\text{cm}^{-1}$ . The lactol-lactol tautomeric structure of gossypol in methanol could be observed in the region.

The signal of the  $\nu(\text{OH})$  and  $\nu(\text{C=O})$  stretching vibrations were also compared in Figure S34 and S35(H). The gossypol in KBr showed the vibrations of the strongest  $\text{O}_{7,7'}\text{-H}$  hydrogen-bonded proton which was well observed at 3422  $\text{cm}^{-1}$ . For gossypol in chloroform, the  $\nu(\text{OH})$  vibration showed two bands at ca. 3650  $\text{cm}^{-1}$  and 3500  $\text{cm}^{-1}$ . And the band at ca. 1616  $\text{cm}^{-1}$  was assigned to the  $\nu(\text{C=O})$  vibrations. The most important spectral feature was the signal of  $\nu(\text{C=C})$  vibrations at 1596 and 1507  $\text{cm}^{-1}$  which were the characteristic of naphthalene ring in aldehyde-aldehyde tautomeric form of gossypol [1].

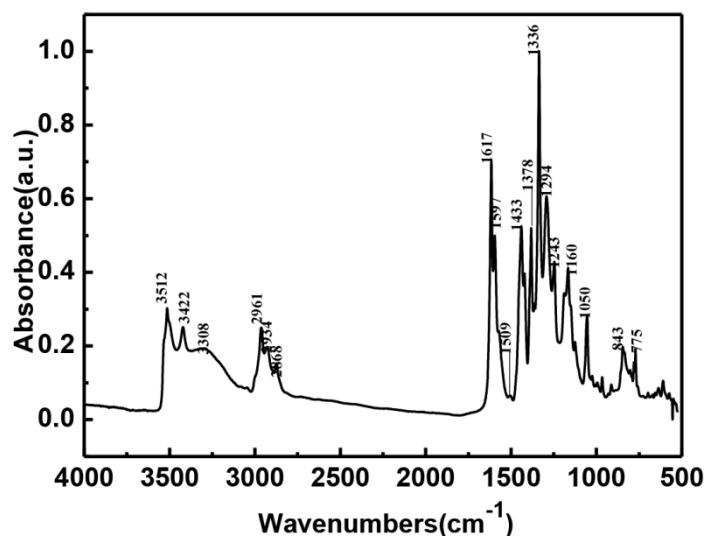

Figure S34. FT-IR spectra of G-KBr solid

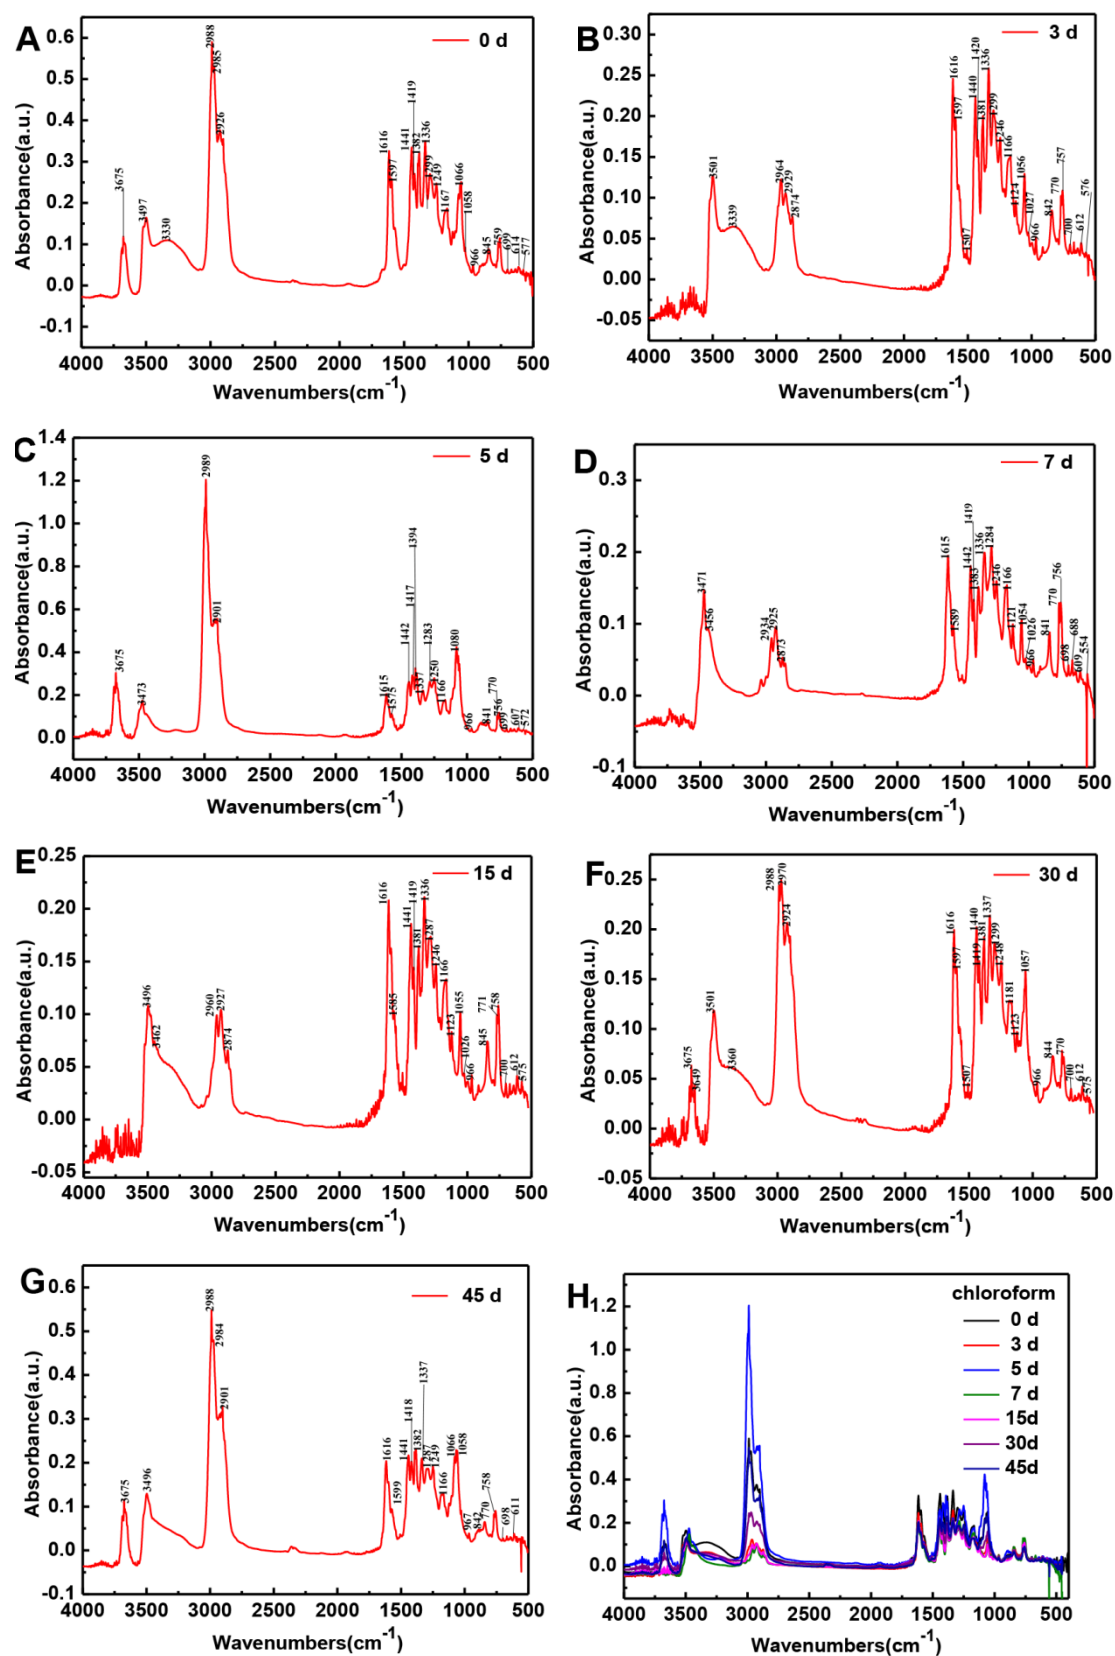

**Figure S35.** FT-IR spectra of gossypol in  $\text{CHCl}_3$  solvent under normal condition without protect from air and light storage condition (a) for 0 day (b) for 3 days (c) for 5 days (d) for 7 days (e) for 15 days (f) for 30 days (g) for 45 days (h) for different days.

**Table S1** Observed FT-IR wavenumbers and vibrational frequencies  $\text{cm}^{-1}$  are in  $\text{CHCl}_3$  solvent for different days

| G-KBr                           | G- $\text{CHCl}_3$              |       |       |       |        |        |        |
|---------------------------------|---------------------------------|-------|-------|-------|--------|--------|--------|
| Wave number( $\text{cm}^{-1}$ ) | Wave number( $\text{cm}^{-1}$ ) |       |       |       |        |        |        |
|                                 | 0Day                            | 3Days | 5Days | 7Days | 15Days | 30Days | 45Days |
| 3514                            | 3675                            | 3501  | 3676  | 3472  | 3496   | 3675   | 3675   |
| 3422                            | 3498                            | 3339  | 3474  | 3456  | 3462   | 3649   | 3497   |
| 2963                            | 3330                            | 2964  | 2990  | 2934  | 2960   | 3502   | 2989   |
| 2928                            | 2989                            | 2929  | 2901  | 2925  | 2927   | 2988   | 2984   |
| 2874                            | 2985                            | 2874  | 1617  | 2873  | 2874   | 2971   | 2901   |
| 1616                            | 2927                            | 1617  | 1575  | 1615  | 1616   | 2925   | 1617   |
| 1596                            | 1616                            | 1597  | 1443  | 1589  | 1507   | 1617   | 1599   |
| 1440                            | 1597                            | 1441  | 1418  | 1443  | 1585   | 1597   | 1441   |
| 1421                            | 1441                            | 1420  | 1394  | 1419  | 1441   | 1507   | 1418   |
| 1382                            | 1419                            | 1381  | 1337  | 1383  | 1420   | 1441   | 1383   |
| 1336                            | 1383                            | 1337  | 1283  | 1337  | 1381   | 1419   | 1337   |
| 1293                            | 1337                            | 1299  | 1251  | 1285  | 1420   | 1420   | 1287   |
| 1246                            | 1300                            | 1247  | 1166  | 1246  | 1337   | 1382   | 1250   |
| 1188                            | 1250                            | 1167  | 1080  | 1166  | 1288   | 1337   | 1167   |
| 1166                            | 1167                            | 1124  | 966   | 1122  | 1247   | 1299   | 1067   |
| 1125                            | 1124                            | 1056  | 841.3 | 1055  | 1167   | 1248   | 1058   |
| 1055                            | 1067                            | 1026  | 770.1 | 1026  | 1123   | 1182   | 966.8  |
| 1026                            | 1058                            | 966.3 | 756.7 | 966.0 | 1056   | 1124   | 842.5  |
| 966.5                           | 966.3                           | 842.9 | 698.7 | 841.1 | 1026   | 1058   | 699.8  |
| 845.4                           | 845.3                           | 770.7 | 607.3 | 770.1 | 966.4  | 966.4  | 758.0  |
| 780.3                           | 758.7                           | 757.9 | 572.6 | 756.8 | 844.7  | 844.5  | 668.8  |
| 771.2                           | 699.0                           | 699.7 |       | 698.0 | 771.0  | 770.9  | 611.8  |
| 697.8                           | 577.0                           | 612.8 |       | 668.7 | 758.3  | 612.6  |        |
| 609.0                           |                                 | 576.0 |       | 609.0 | 699.5  | 575.5  |        |
| 573.0                           |                                 |       |       | 553.9 | 612.8  |        |        |
|                                 |                                 |       |       |       | 575.6  |        |        |

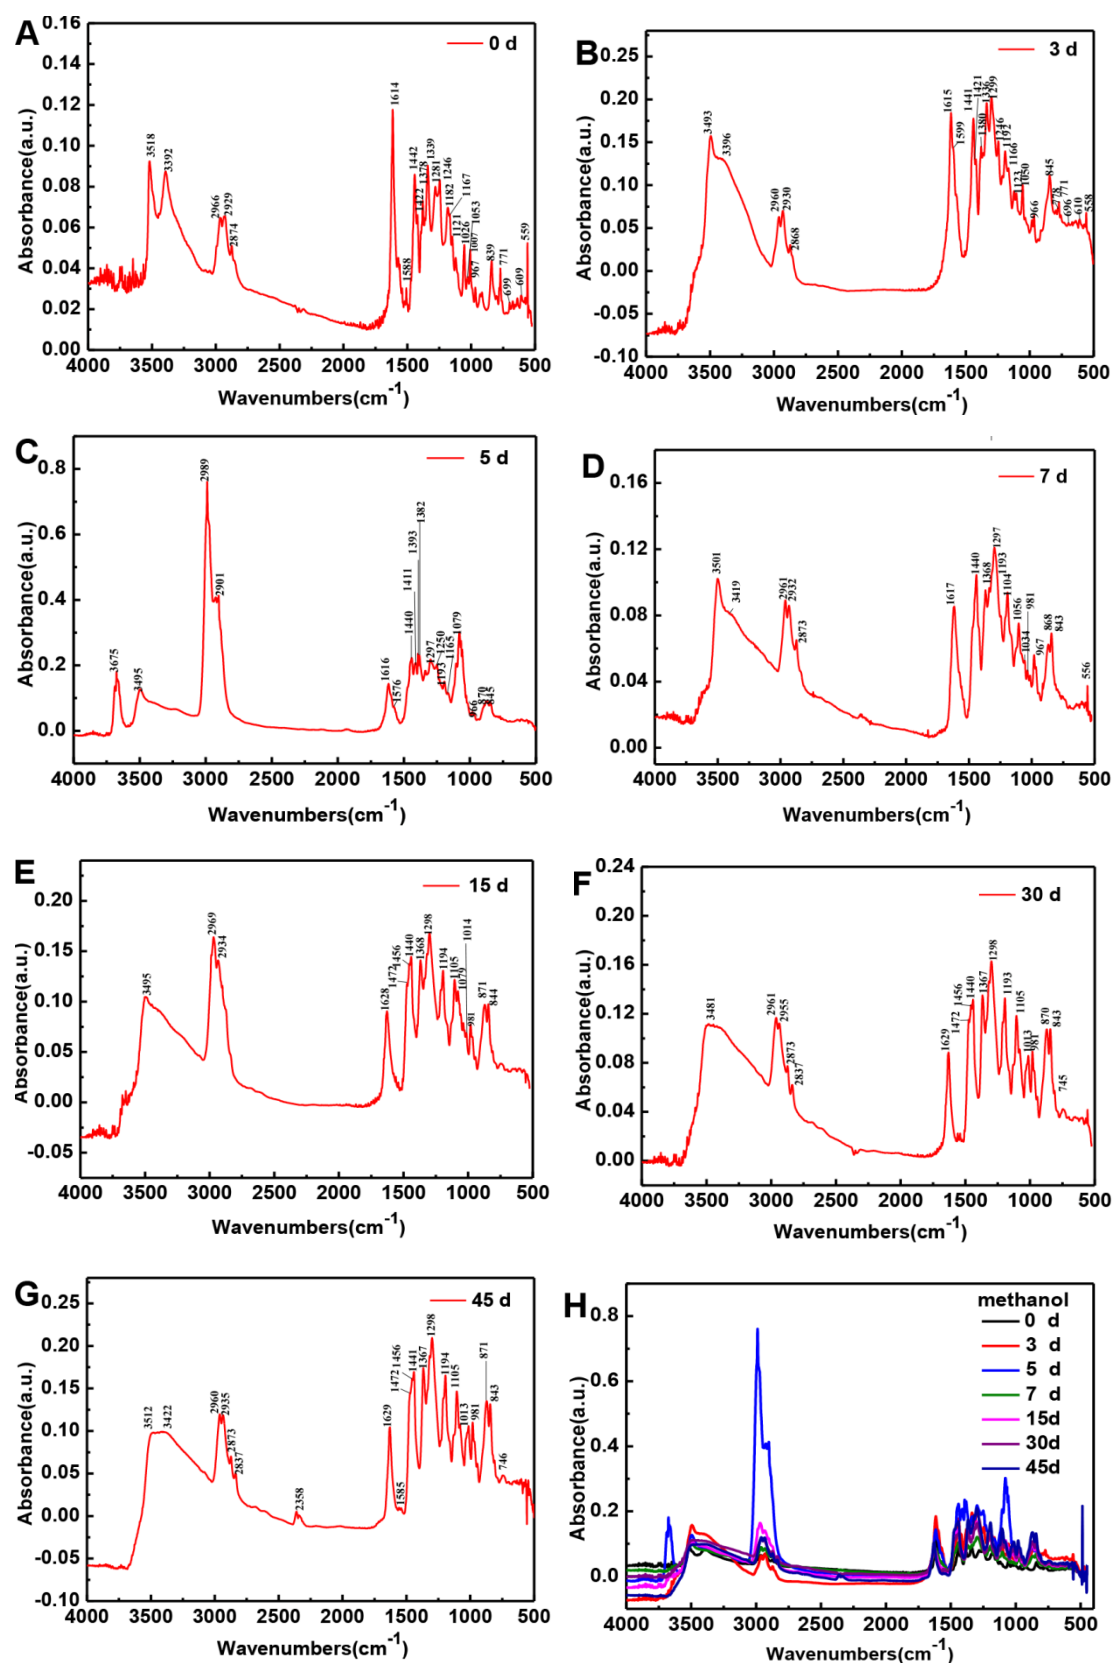

**Figure S36.** FT-IR spectra of gossypol in  $\text{CH}_3\text{OH}$  solvent under normal condition without protect from air and light storage condition (a) for 0 day (b) for 3 days (c) for 5 days (d) for 7 days (e) for 15 days (f) for 30 days (g) for 45 days (h) for different days.



**Table S2** Observed FT-IR wave numbers and vibration frequencies  $\text{cm}^{-1}$  are in  $\text{CH}_3\text{OH}$  solvent for different days

| G-KBr                           | G- $\text{CH}_3\text{OH}$       |       |       |       |        |        |        |
|---------------------------------|---------------------------------|-------|-------|-------|--------|--------|--------|
| Wave number( $\text{cm}^{-1}$ ) | Wave number( $\text{cm}^{-1}$ ) |       |       |       |        |        |        |
|                                 | 0Day                            | 3Days | 5Days | 7Days | 15Days | 30Days | 45Days |
| 3514                            | 3519                            | 3494  | 3675  | 3501  | 3496   | 3482   | 3482   |
| 3422                            | 3393                            | 3396  | 3495  | 3419  | 2970   | 2961   | 2960   |
| 2963                            | 2966                            | 2961  | 2989  | 2961  | 2935   | 2955   | 2935   |
| 2928                            | 2930                            | 2931  | 2901  | 2932  | 1628   | 2873   | 2873   |
| 2874                            | 2874                            | 2868  | 1616  | 2873  | 1472   | 2838   | 2837   |
| 1616                            | 1615                            | 1616  | 1576  | 1617  | 1456   | 1629   | 1629   |
| 1596                            | 1588                            | 1599  | 1441  | 1441  | 1441   | 1472   | 1472   |
| 1440                            | 1442                            | 1440  | 1412  | 1369  | 1369   | 1456   | 1456   |
| 1421                            | 1422                            | 1421  | 1394  | 1297  | 1299   | 1441   | 1441   |
| 1382                            | 1379                            | 1380  | 1382  | 1193  | 1194   | 1367   | 1368   |
| 1336                            | 1340                            | 1337  | 1298  | 1104  | 1105   | 1298   | 1299   |
| 1293                            | 1281                            | 1300  | 1250  | 1056  | 1079   | 1194   | 1194   |
| 1246                            | 1246                            | 1246  | 1194  | 1035  | 1013   | 1105   | 1106   |
| 1188                            | 1183                            | 1192  | 1165  | 981.4 | 981.3  | 1013   | 1013   |
| 1166                            | 1167                            | 1166  | 1080  | 967.0 | 871.4  | 981.2  | 981.4  |
| 1125                            | 1121                            | 1123  | 981.2 | 868.6 | 844.0  | 870.3  | 871.7  |
| 1055                            | 1054                            | 1055  | 966.9 | 843.2 |        | 843.2  | 843.9  |
| 1026                            | 1026                            | 966.9 | 870.1 | 556.7 |        |        | 746.4  |
| 966.5                           | 1008                            | 845.1 | 845.1 |       |        |        |        |
| 845.4                           | 966.8                           | 778.0 |       |       |        |        |        |
| 780.3                           | 839.5                           | 771.8 |       |       |        |        |        |
| 771.2                           | 771.0                           | 696.2 |       |       |        |        |        |
| 697.8                           | 699.0                           | 610.0 |       |       |        |        |        |
| 609.0                           | 577.0                           | 558.5 |       |       |        |        |        |
| 573.0                           | 559.1                           |       |       |       |        |        |        |

#### 4. HPLC-QTOF-MS spectrum of Gossypol solutions

Sample Preparation for LC-MS spectra Analysis: 5.0 mg of gossypol was dissolved in 1.0 mL of menthol, chloroform, and Methyl sulfoxide in a screw-capped vial respectively. The samples were stored under normal condition without protecting from light and air for 0 days, 3 days, 5 days, 7days, 15 days, 30 days and 45 days at room temperature and LC-MS measurements were taken at different time intervals.

The LC-MS analyses were performed on an Agilent liquid chromatography coupled to a 4000 QST Elite mass spectrometer, equipped with electro spray ionization (ESI) source and a quadrupole-time of flight-mass spectrometry. 5 $\mu\text{L}$  of the diluted gossypol solutions was injected onto a Phenomenex column(250 $\times$ 4.60mm, Synergi 4u Hydro-RP 80A) at 30 $^{\circ}\text{C}$  with a flow rate of 300  $\mu\text{L}/\text{min}$ , Mobile phase ACN (A) and 0.1%(v/v) formic acid in water (B) were used for chromatographic separation. Gossypol were eluted with a gradient of 50%A and 50% B (v/v) from 0-8min; 100% A from 8-20min. Mass detection was carried out after electro spray ionization (ESI) in negative -ion full scan mode. The settings of the mass spectrometer were as

follows: spray voltage, 4.5 kV; Source Temperature, 450°C; maximum injection time, 250 ms; scan range,  $m/z$  100 to 1500; Nitrogen was used as sheath gas (pressure 40psi) and auxiliary gas (pressure 60 psi). The in-source collision induced dissociation energy (CID) was set at 50 eV.

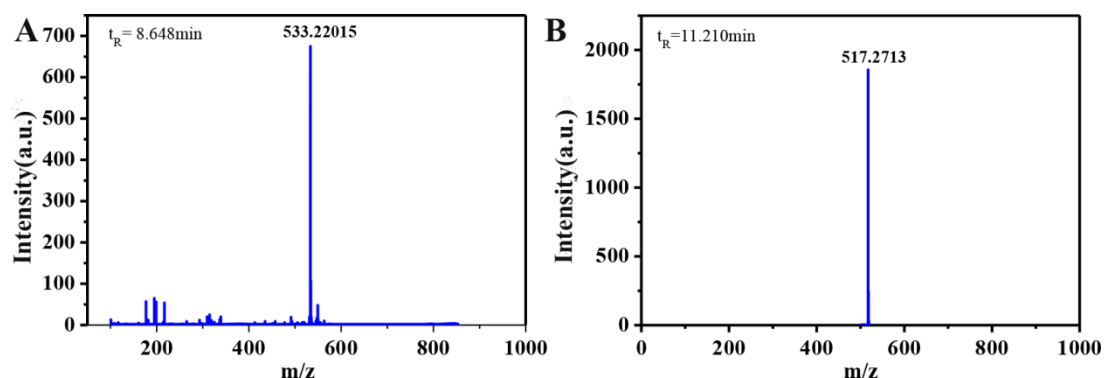

**Figure S37.** LC-MS chromatograms of gossypol in  $\text{CHCl}_3$  solution normal condition without protect from air and light storage condition in 0 day. (A) Mass spectrum acquired in retention time (8.65min) in correspond chromatogram. (B) Mass spectrum acquired in retention time (11.21min) in correspond chromatogram.

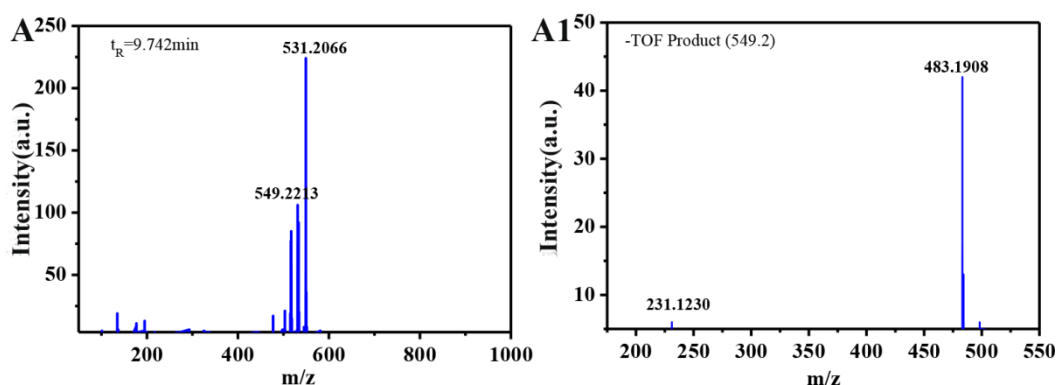

**Figure S38.** LC-MS chromatograms of gossypol in  $\text{CHCl}_3$  solution normal condition without protect from air and light storage condition in 3 days. (A) Mass spectrum acquired in retention time (9.74min) in correspond chromatogram. (A1) Fragment of molecular ion at  $m/z$  549.2.

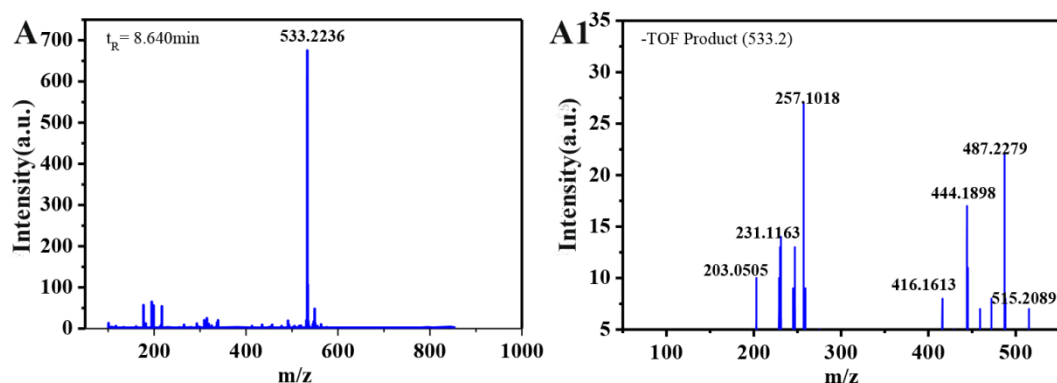

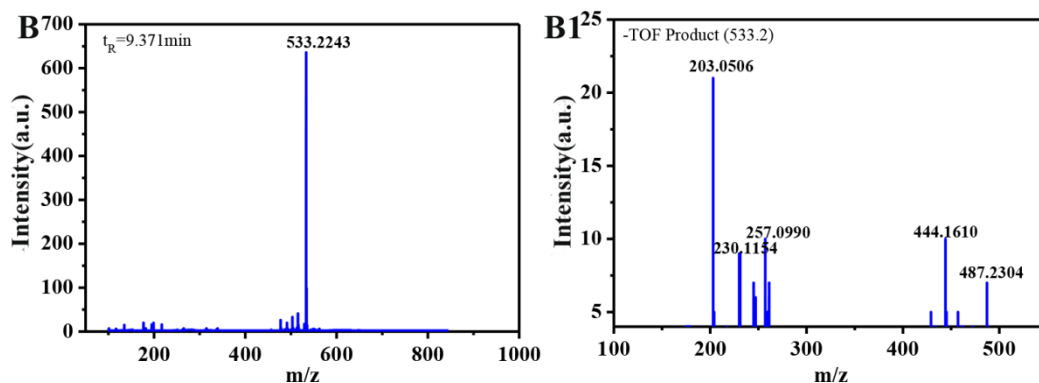

**Figure S39.** LC-MS chromatograms of gossypol in  $\text{CHCl}_3$  solution normal condition without protect from air and light storage condition in 3 days. (A) Mass spectrum acquired in retention time (8.64min) in correspond chromatogram. (A1) Fragment of molecular ion at  $m/z$  533.2. (B) Mass spectrum acquired in retention time (9.37min) in correspond chromatogram. (B1) Fragment of molecular ion at  $m/z$  533.2.

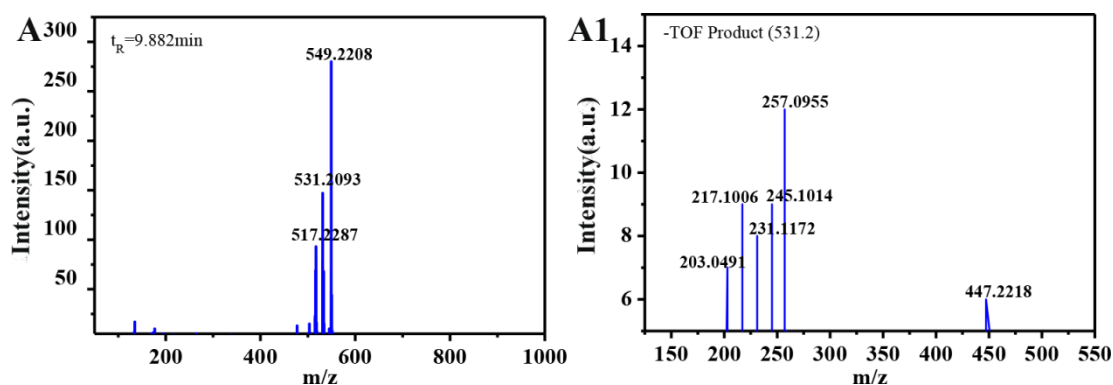

**Figure S40.** LC-MS chromatograms of gossypol in  $\text{CHCl}_3$  solution normal condition without protect from air and light storage condition in 3 days. (A) Mass spectrum acquired in retention time (9.88min) in correspond chromatogram. (A1) Fragment of molecular ion at  $m/z$  531.2.

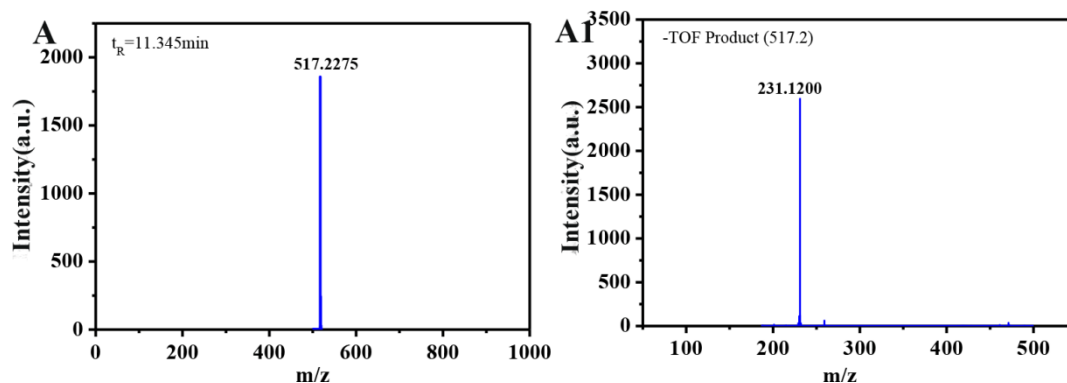

**Figure S41.** LC-MS chromatograms of gossypol in  $\text{CHCl}_3$  solution normal condition without protect from air and light storage condition in 3 days. (A) Mass spectrum acquired in retention time (11.35min) in correspond chromatogram. (A1) Fragment of molecular ion at  $m/z$  517.2.

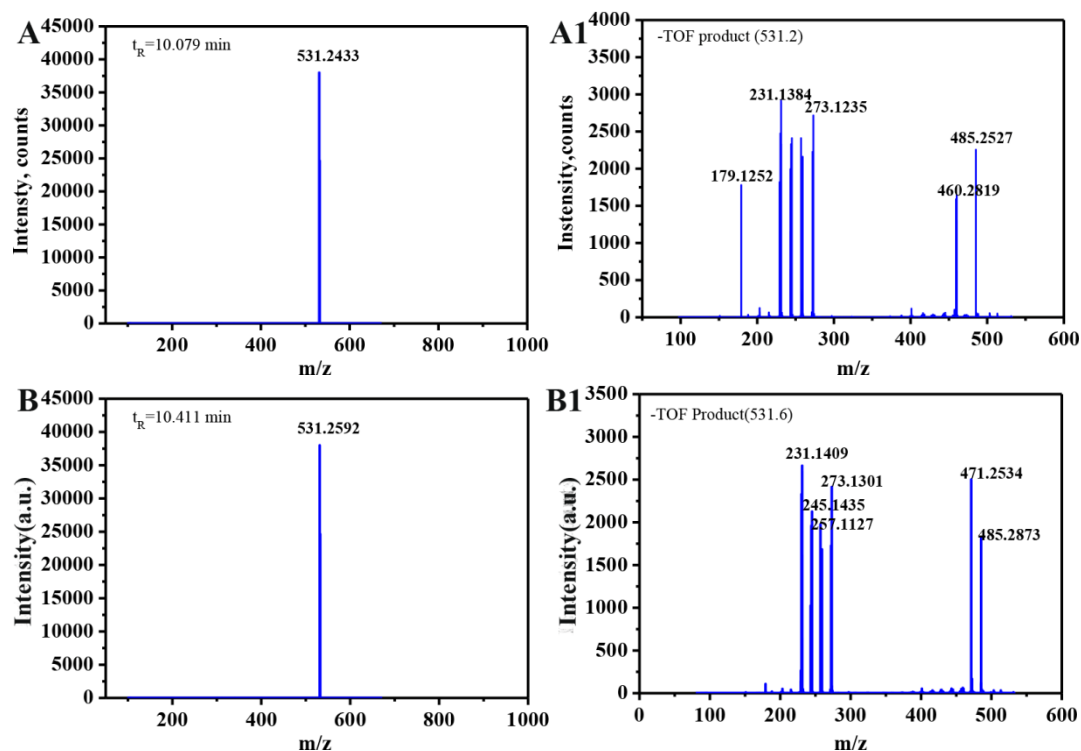

**Figure S42.** LC-MS chromatograms of gossypol in  $\text{CHCl}_3$  solution normal condition without protect from air and light storage condition in 5 days. (A) Mass spectrum acquired in retention time (10.08min) in correspond chromatogram. (A1) Fragment of molecular ion at  $m/z 531.2$ . (B) Mass spectrum acquired in retention time (10.411min) in correspond chromatogram. (B1) Fragment of molecular ion at  $m/z 531.6$ .

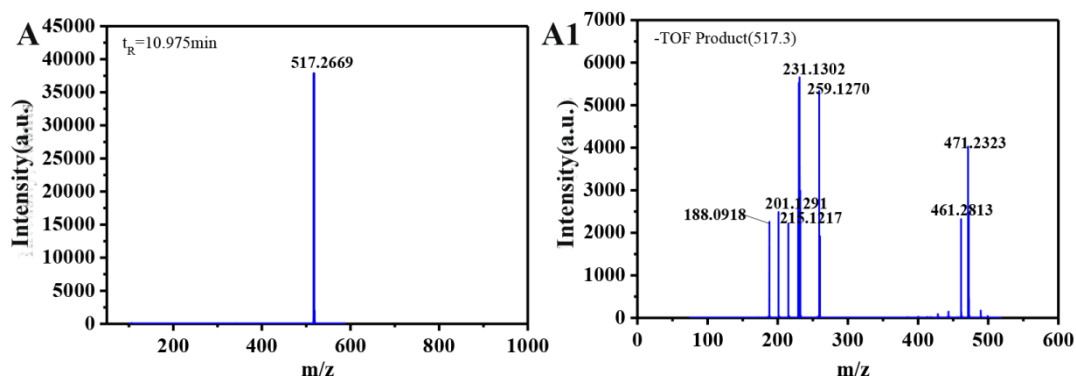

**Figure S43.** LC-MS chromatograms of gossypol in  $\text{CHCl}_3$  solution normal condition without protect from air and light storage condition in 5 days. (A) Mass spectrum acquired in retention time (10.98min) in correspond chromatogram. (A1) Fragment of molecular ion at  $m/z 517.3$ .

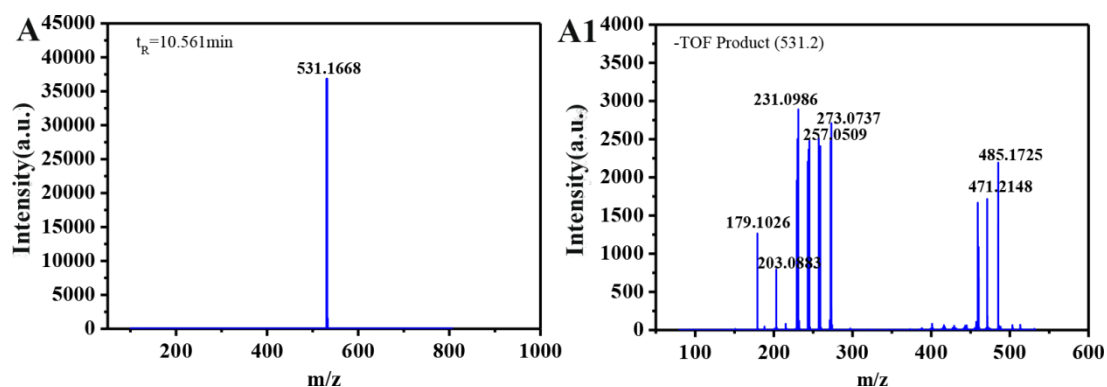

**Figure S44.** LC-MS chromatograms of gossypol in  $\text{CHCl}_3$  solution normal condition without protect from air and light storage condition in 7 days. (A) Mass spectrum acquired in retention time (10.56min) in correspond chromatogram. (A1) Fragment of molecular ion at  $m/z$  531.2.

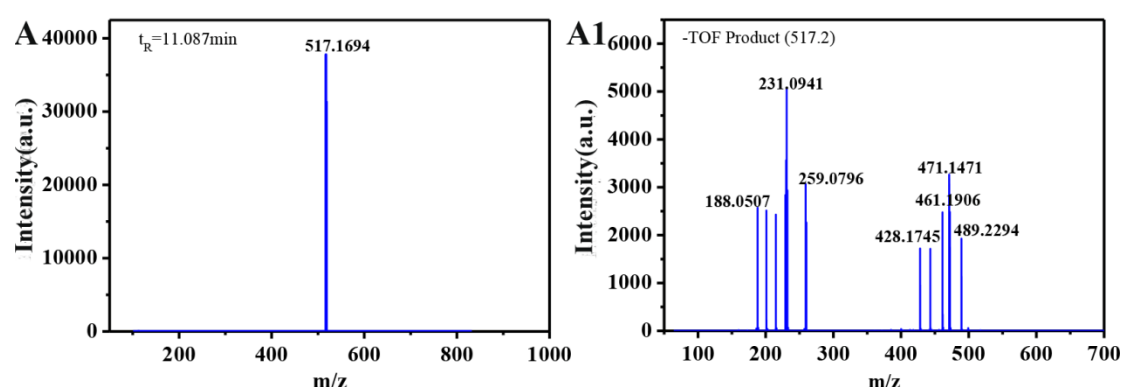

**Figure S45.** LC-MS chromatograms of gossypol in  $\text{CHCl}_3$  solution normal condition without protect from air and light storage condition in 7 days. (A) Mass spectrum acquired in retention time (11.48min) in correspond chromatogram. (A1) Fragment of molecular ion at  $m/z$  517.2.

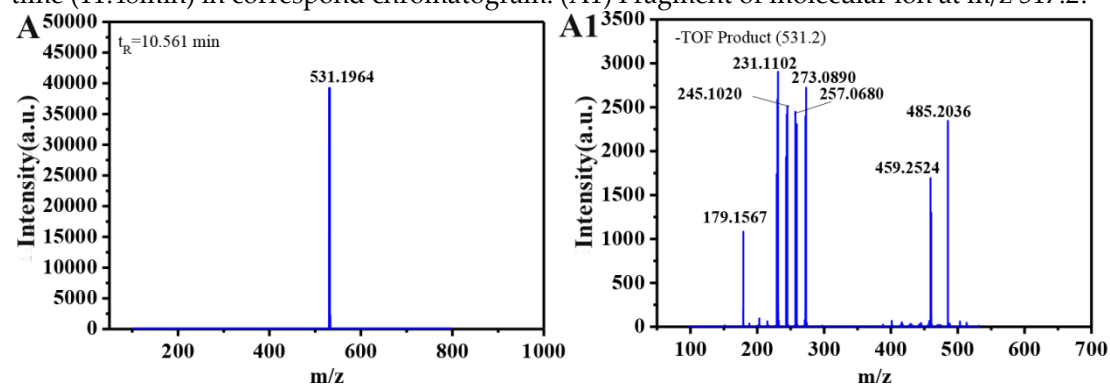

**Figure S46.** LC-MS chromatograms of gossypol in  $\text{CHCl}_3$  solution normal condition without protect from air and light storage condition in 15 days. (A) Mass spectrum acquired in retention time (10.56min) in correspond chromatogram. (A1) Fragment of molecular ion at  $m/z$  531.2.

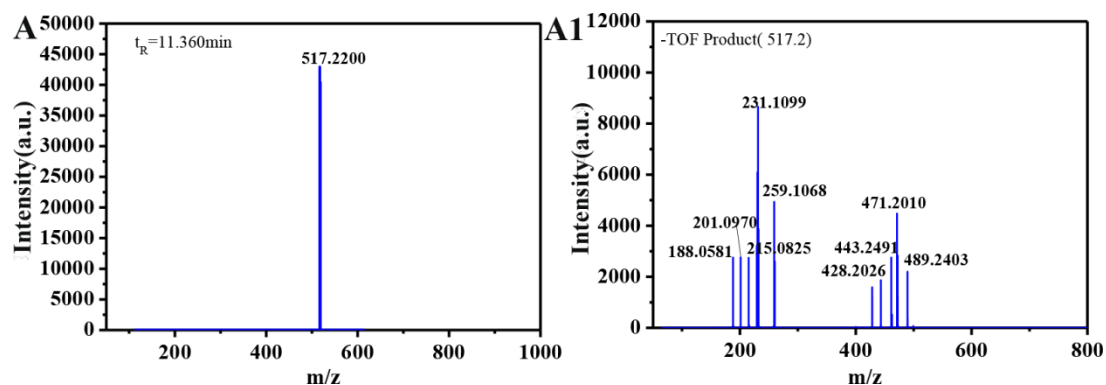

**Figure S47.** LC-MS chromatograms of gossypol in  $\text{CHCl}_3$  solution normal condition without protect from air and light storage condition in 15 days. (A) Mass spectrum acquired in retention time (11.36min) in correspond chromatogram. (A1) Fragment of molecular ion at  $m/z$  517.2.

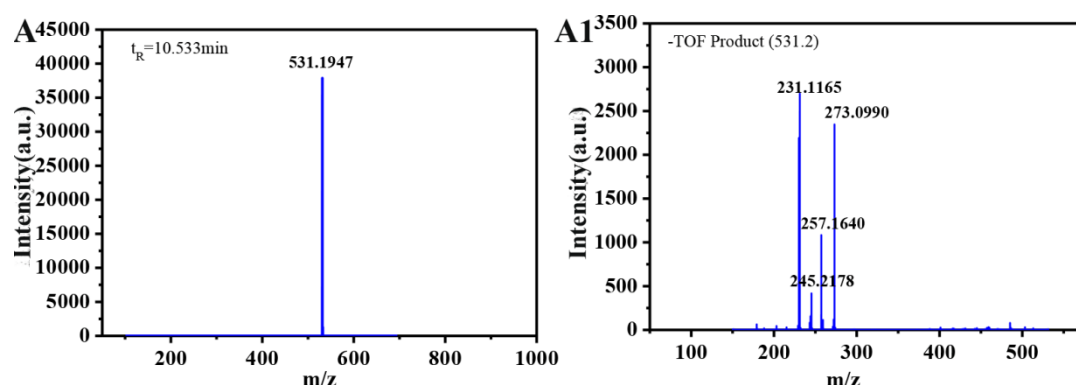

**Figure S48.** LC-MS chromatograms of gossypol in  $\text{CHCl}_3$  solution normal condition without protect from air and light storage condition in 30 days. (A) Mass spectrum acquired in retention time (10.53min) in correspond chromatogram. (A1) Fragment of molecular ion at  $m/z$  531.2.

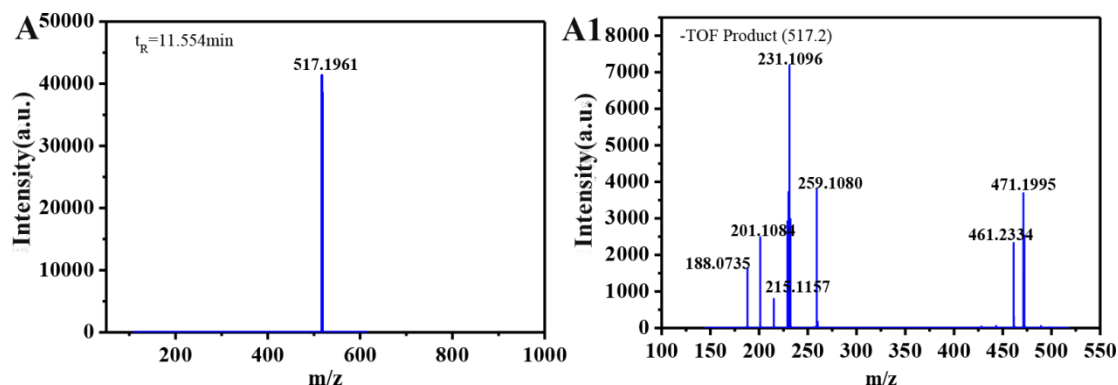

**Figure S49.** LC-MS chromatograms of gossypol in  $\text{CHCl}_3$  solution normal condition without protect from air and light storage condition in 30 days. (A) Mass spectrum acquired in retention time (11.54min) in correspond chromatogram. (A1) Fragment of molecular ion at  $m/z$  517.2.

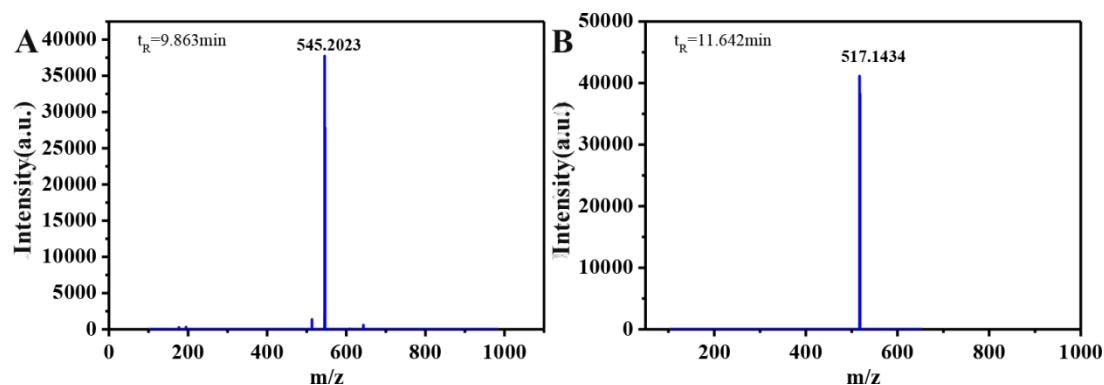

**Figure S50.** LC-MS chromatograms of gossypol in  $\text{CH}_3\text{OH}$  solution normal condition without protect from air and light storage condition in 0 day. (A) Mass spectrum acquired in retention time (9.86min) in correspond chromatogram. (B) Mass spectrum acquired in retention time (11.64min) in correspond chromatogram.

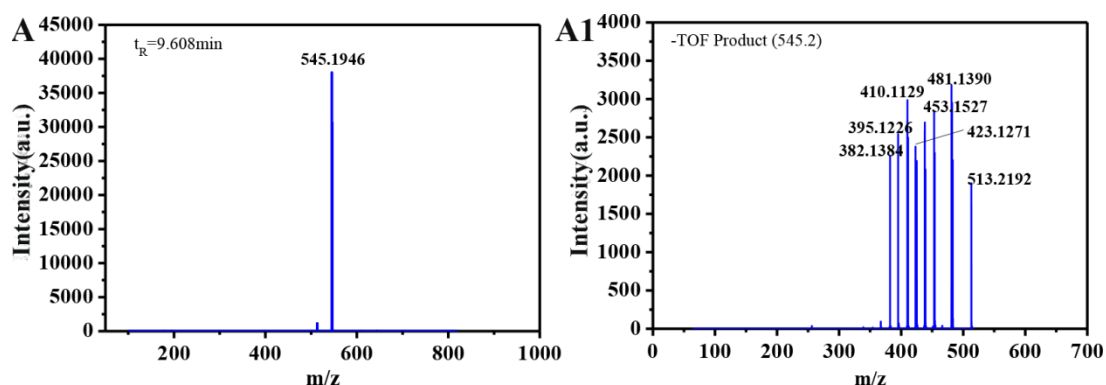

**Figure S51.** LC-MS chromatograms of gossypol in  $\text{CH}_3\text{OH}$  solution normal condition without protect from air and light storage condition in 3 days. (A) Mass spectrum acquired in retention time (9.61min) in correspond chromatogram. (A1) Fragment of molecular ion at  $m/z$  545.2.

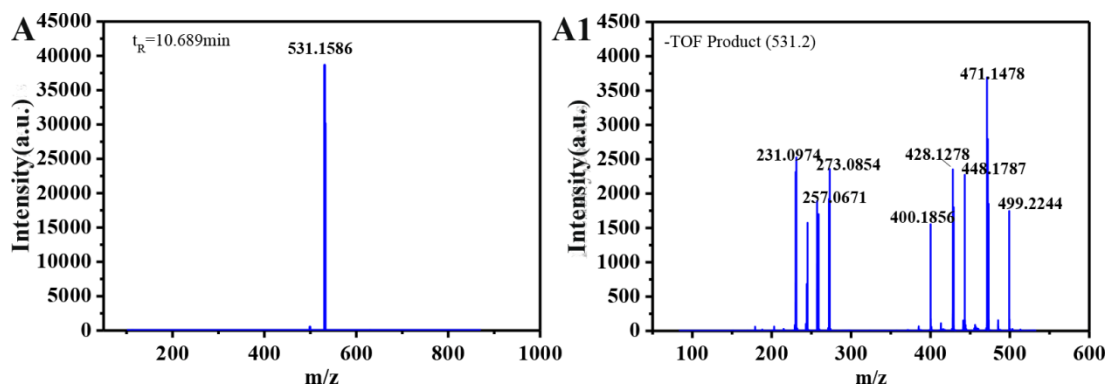

**Figure S52.** LC-MS chromatograms of gossypol in  $\text{CH}_3\text{OH}$  solution normal condition without protect from air and light storage condition in 3 days. (A) Mass spectrum acquired in retention time (10.69min) in correspond chromatogram. (A1) Fragment of molecular ion at  $m/z$  531.2.

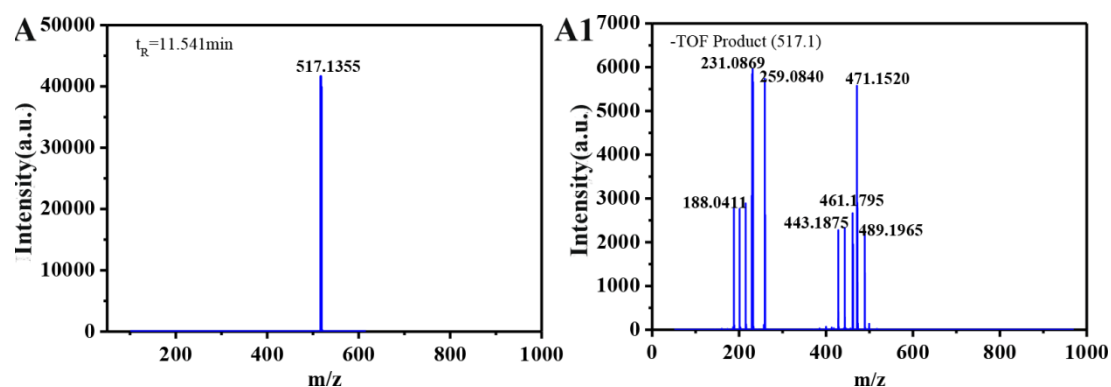

**Figure S53.** LC-MS chromatograms of gossypol in CH<sub>3</sub>OH solution normal condition without protect from air and light storage condition in 3 days. (A) Mass spectrum acquired in retention time (11.54min) in correspond chromatogram. (A1) Fragment of molecular ion at m/z 517.1

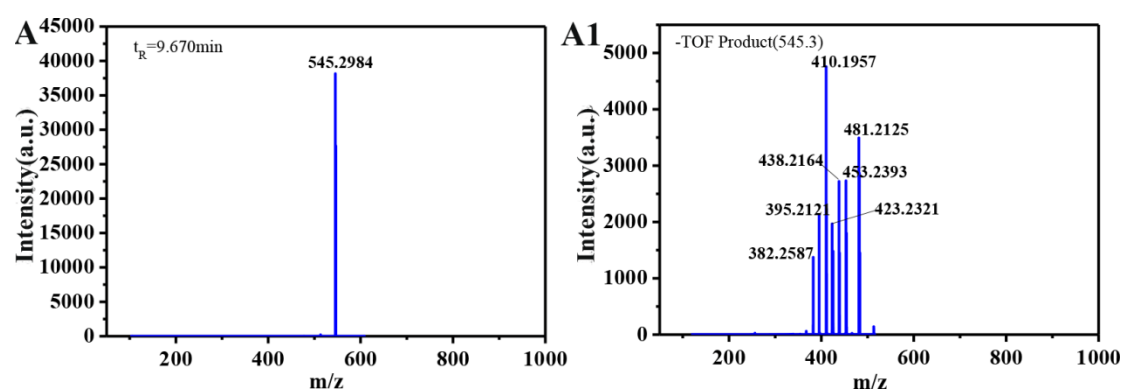

**Figure S54.** LC-MS chromatograms of gossypol in CH<sub>3</sub>OH solution normal condition without protect from air and light storage condition in 5 days. (A) Mass spectrum acquired in retention time (9.67min) in correspond chromatogram. (A1) Fragment of molecular ion at m/z 545.3.

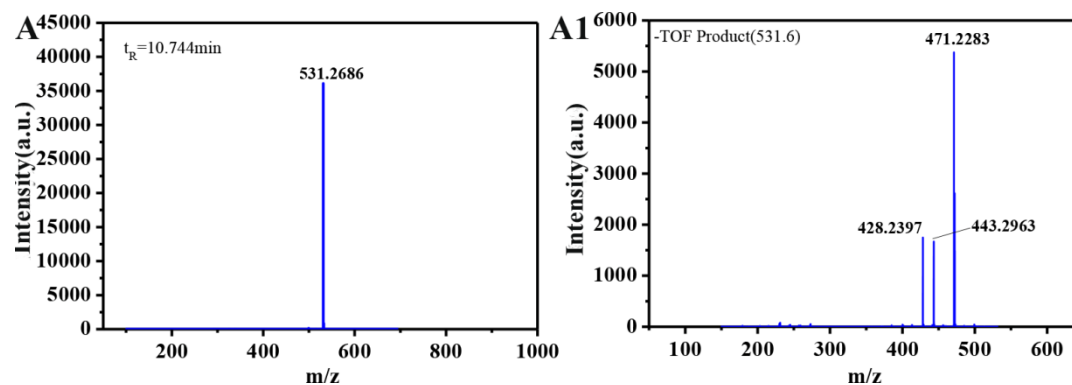

**Figure S55.** LC-MS chromatograms of gossypol in CH<sub>3</sub>OH solution normal condition without protect from air and light storage condition in 5 days. (A) Mass spectrum acquired in retention time (10.74min) in correspond chromatogram. (A1) Fragment of molecular ion at m/z 531.6.



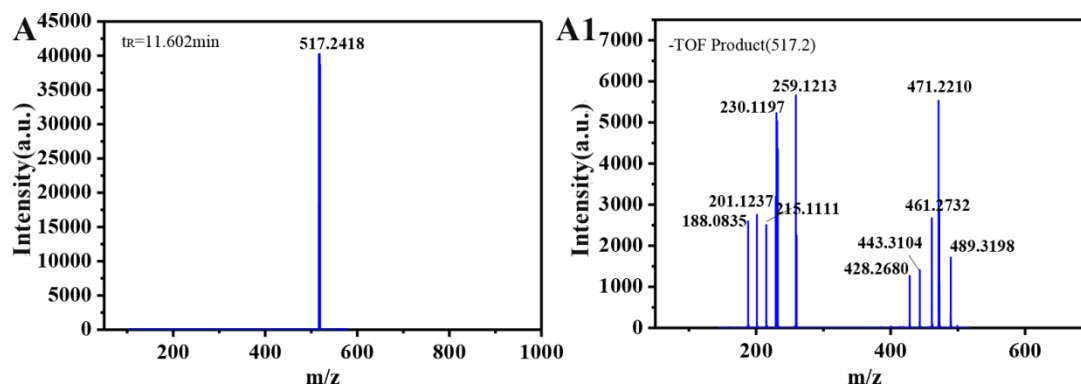

**Figure S56.** LC-MS chromatograms of gossypol in CH<sub>3</sub>OH solution normal condition without protect from air and light storage condition in 5 days. (A) Mass spectrum acquired in retention time (11.60min) in correspond chromatogram. (A1) Fragment of molecular ion at m/z 517.2.

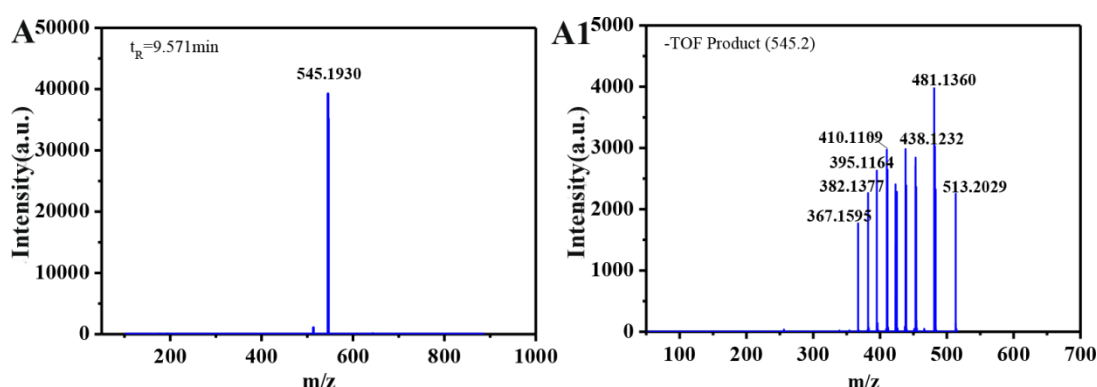

**Figure S57.** LC-MS chromatograms of gossypol in CH<sub>3</sub>OH solution normal condition without protect from air and light storage condition in 7 days. (A) Mass spectrum acquired in retention time (9.57min) in correspond chromatogram. (A1) Fragment of molecular ion at m/z 545.2.

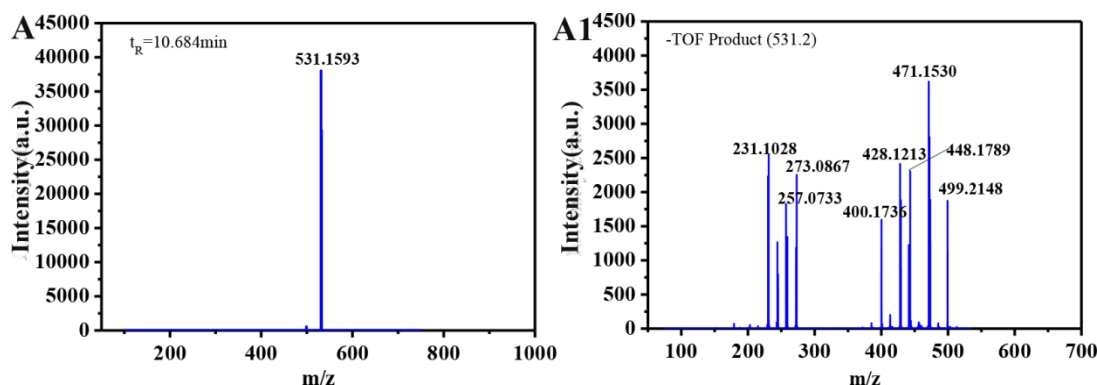

**Figure S58.** LC-MS chromatograms of gossypol in CH<sub>3</sub>OH solution normal condition without protect from air and light storage condition in 7 days. (A) Mass spectrum acquired in retention time (10.68min) in correspond chromatogram. (A1) Fragment of molecular ion at m/z 531.2.

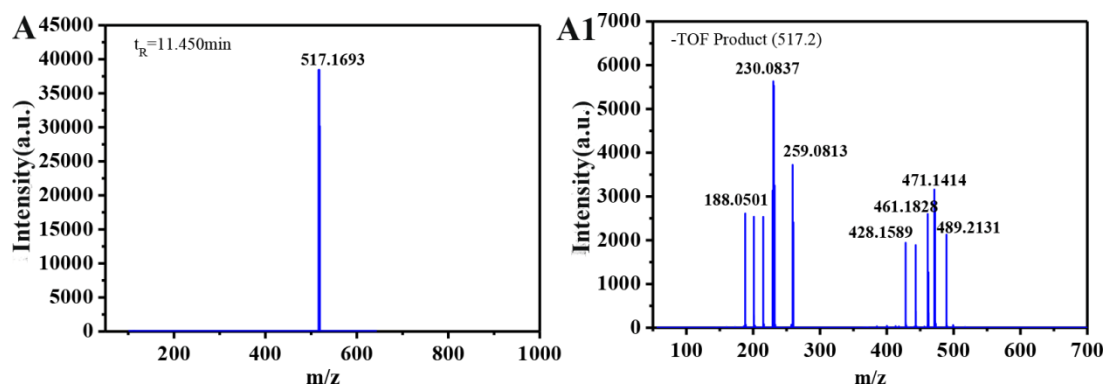

**Figure S59.** LC-MS chromatograms of gossypol in  $\text{CH}_3\text{OH}$  solution normal condition without protect from air and light storage condition in 7 days. (A) Mass spectrum acquired in retention time (11.45min) in correspond chromatogram. (A1) Fragment of molecular ion at  $m/z$  517.2.

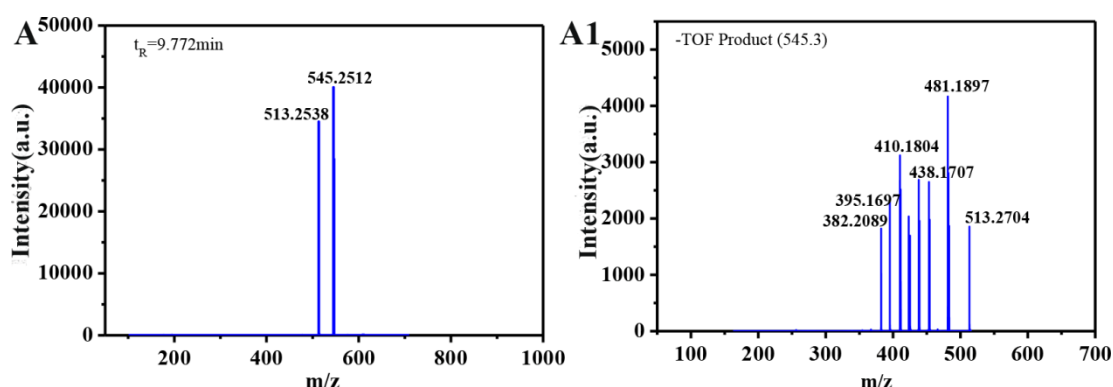

**Figure S60.** LC-MS chromatograms of gossypol in  $\text{CH}_3\text{OH}$  solution normal condition without protect from air and light storage condition in 15 days. (A) Mass spectrum acquired in retention time (9.77min) in correspond chromatogram. (A1) Fragment of molecular ion at  $m/z$  545.3.

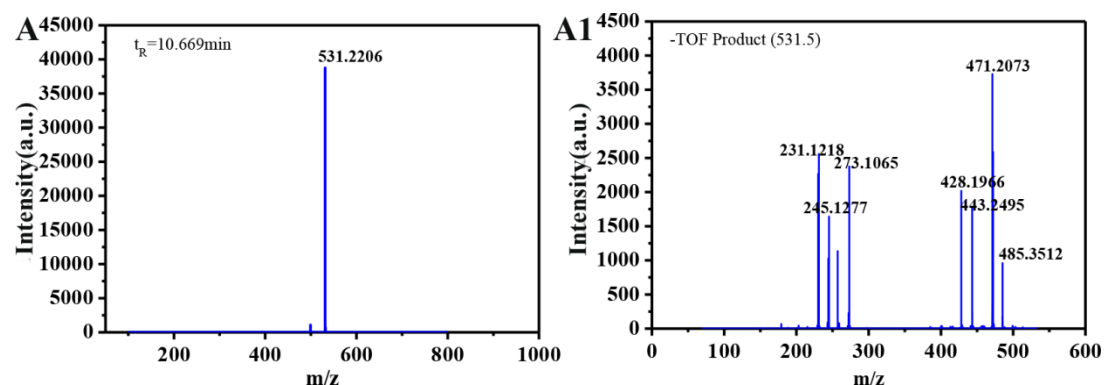

**Figure S61.** LC-MS chromatograms of gossypol in  $\text{CH}_3\text{OH}$  solution normal condition without protect from air and light storage condition in 15 days. (A) Mass spectrum acquired in retention time (10.67min) in correspond chromatogram. (A1) Fragment of molecular ion at  $m/z$  531.5.

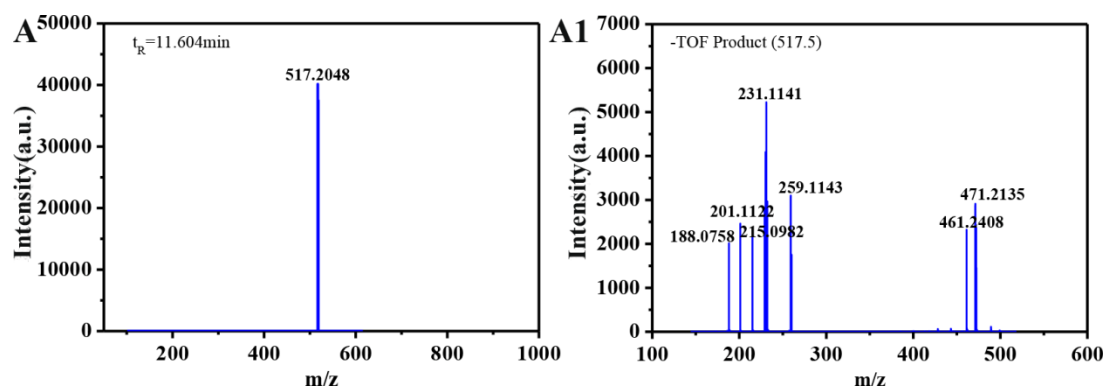

**Figure S62.** LC-MS chromatograms of gossypol in CH<sub>3</sub>OH solution normal condition without protect from air and light storage condition in 15 days. (A) Mass spectrum acquired in retention time (11.60min) in correspond chromatogram. (A1) Fragment of molecular ion at m/z 517.2.

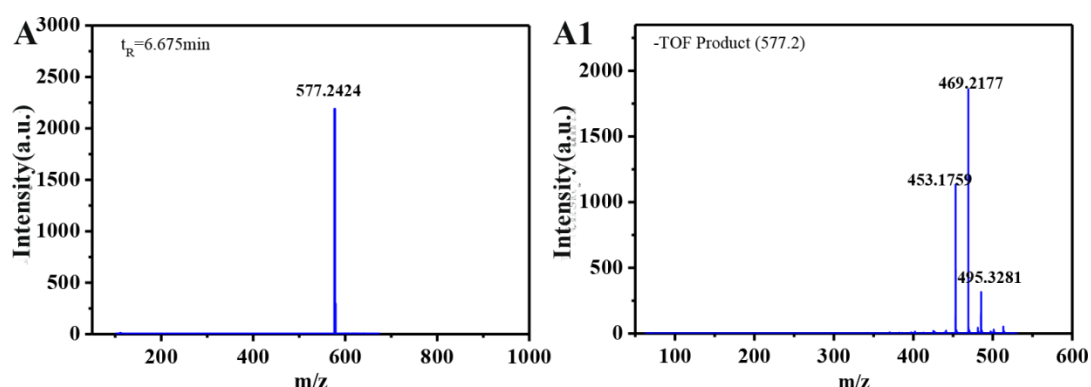

**Figure S63.** LC-MS chromatograms of gossypol in CH<sub>3</sub>OH solution normal condition without protect from air and light storage condition in 30 days. (A) Mass spectrum acquired in retention time (6.67min) in correspond chromatogram. (A1) Fragment of molecular ion at m/z 577.2

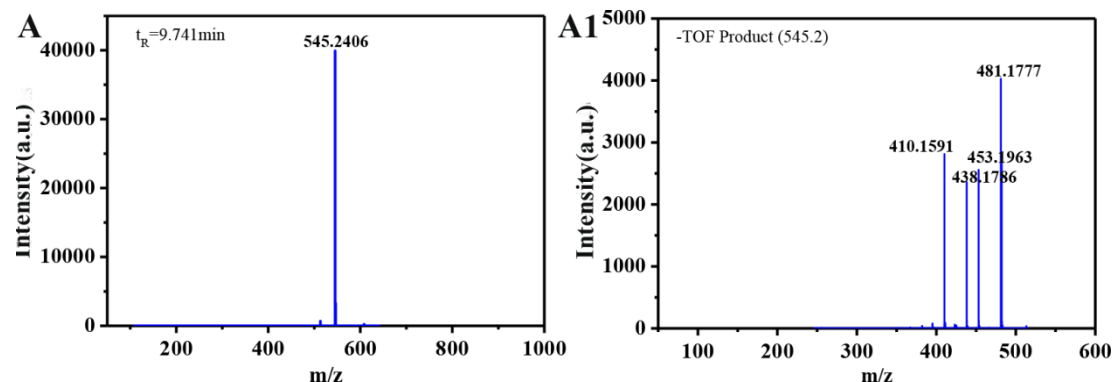

**Figure S64.** LC-MS chromatograms of gossypol in CH<sub>3</sub>OH solution normal condition without protect from air and light storage condition in 30 days. (A) Mass spectrum acquired in retention time (9.74min) in correspond chromatogram. (A1) Fragment of molecular ion at m/z 545.2.

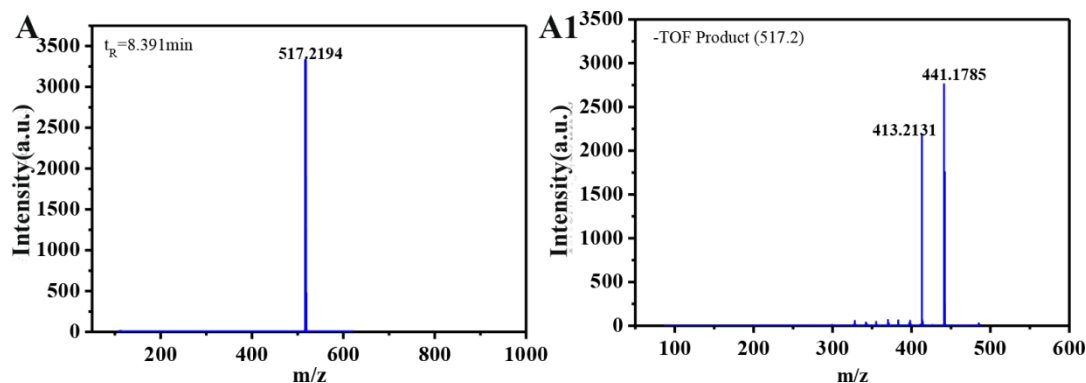

**Figure S65.** LC-MS chromatograms of gossypol in  $\text{CH}_3\text{OH}$  solution normal condition without protect from air and light storage condition in 30 days. (A) Mass spectrum acquired in retention time (8.4min) in correspond chromatogram. (A1) Fragment of molecular ion at  $m/z$  517.2.

**Table S3** Diff of main fragmentation of gossypol molecular ion

| Formula                                | Calculated Mass (m/z) | Measured Mass (m/z) | Diff (ppm) |
|----------------------------------------|-----------------------|---------------------|------------|
| $\text{C}_{30}\text{H}_{29}\text{O}_8$ | 517.1862              | 517.1864            | 0.303024   |
| $\text{C}_{31}\text{H}_{31}\text{O}_8$ | 531.2019              | 531.2014            | -0.92876   |
| $\text{C}_{30}\text{H}_{29}\text{O}_9$ | 533.1812              | 533.1838            | 4.955289   |
| $\text{C}_{14}\text{H}_{15}\text{O}_3$ | 231.1021              | 231.1017            | -1.81531   |
| $\text{C}_{32}\text{H}_{33}\text{O}_8$ | 545.2175              | 545.2172            | -0.07968   |
| $\text{C}_{29}\text{H}_{27}\text{O}_6$ | 471.1808              | 471.1852            | 9.414727   |
| $\text{C}_{29}\text{H}_{29}\text{O}_7$ | 489.1913              | 489.1924            | 2.190059   |
| $\text{C}_{30}\text{H}_{27}\text{O}_7$ | 499.1757              | 499.1743            | -2.76168   |
| $\text{C}_{29}\text{H}_{25}\text{O}_5$ | 453.1702              | 453.1711            | 1.98777    |
| $\text{C}_{30}\text{H}_{25}\text{O}_6$ | 481.1651              | 481.1641            | -2.10706   |
| $\text{C}_{31}\text{H}_{29}\text{O}_7$ | 513.1913              | 513.1904            | -1.80954   |

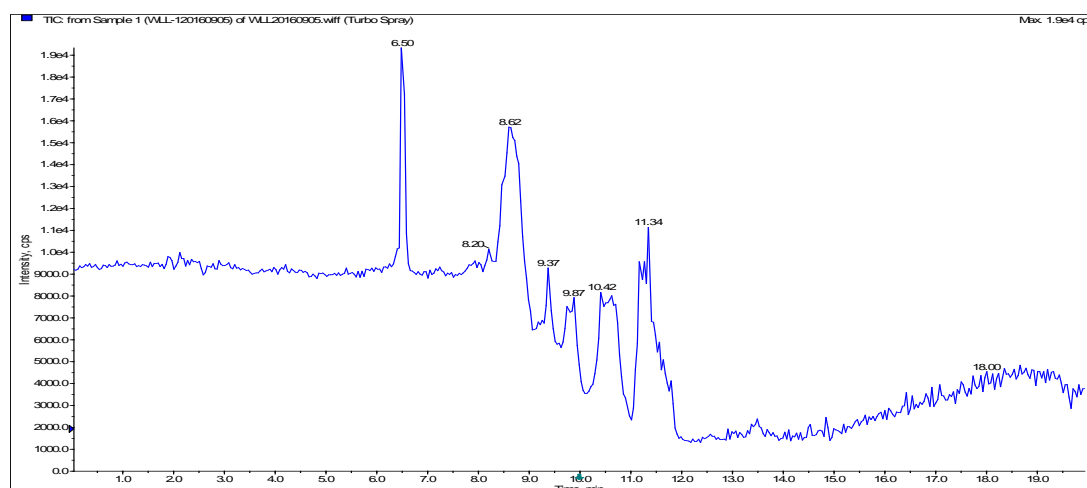

**Figure S66.** TIC of gossypol in  $\text{CHCl}_3$  solution normal condition without protect from air and light storage condition in 3 days.

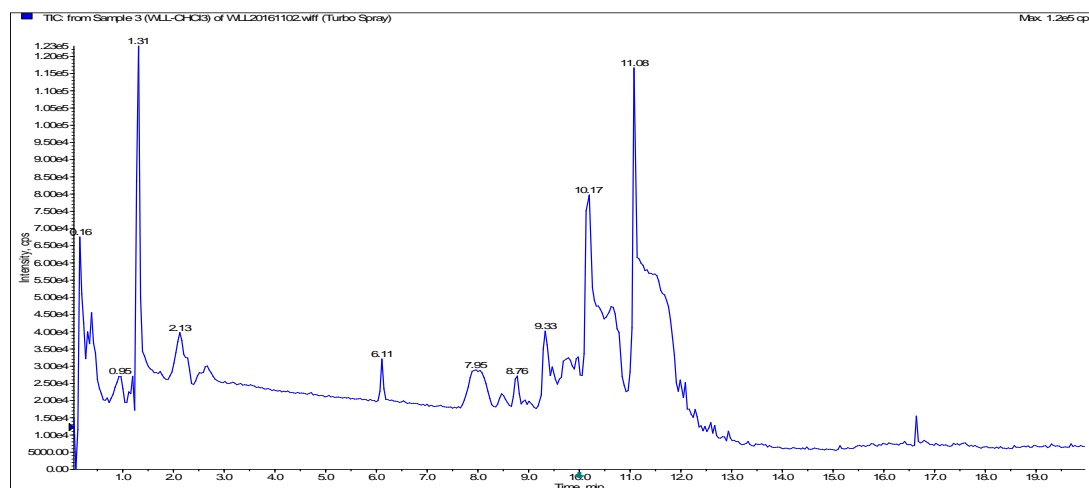

**Figure S67.** TIC of gossypol in  $\text{CHCl}_3$  solution normal condition without protect from air and light storage condition in 5 days.

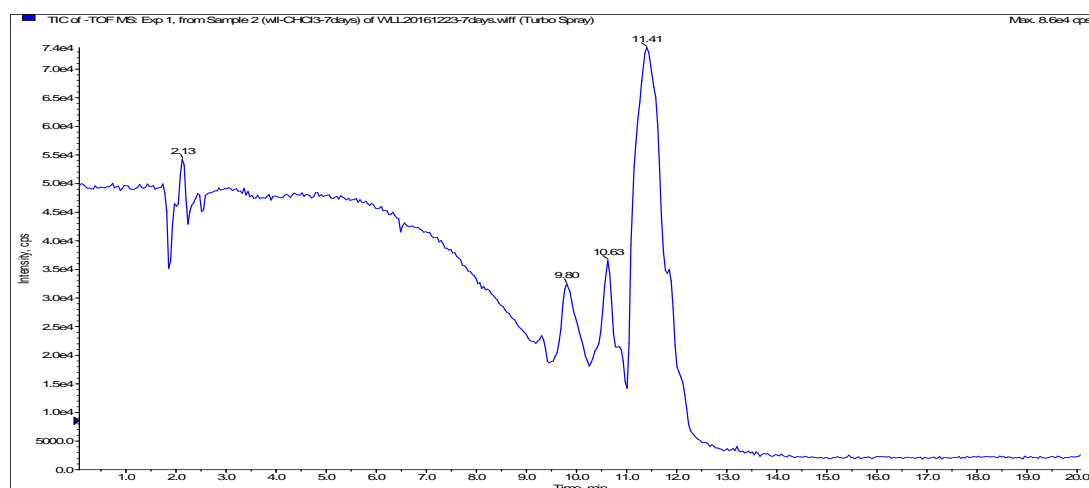

**Figure S68.** TIC of gossypol in  $\text{CHCl}_3$  solution normal condition without protect from air and light storage condition in 7 days.

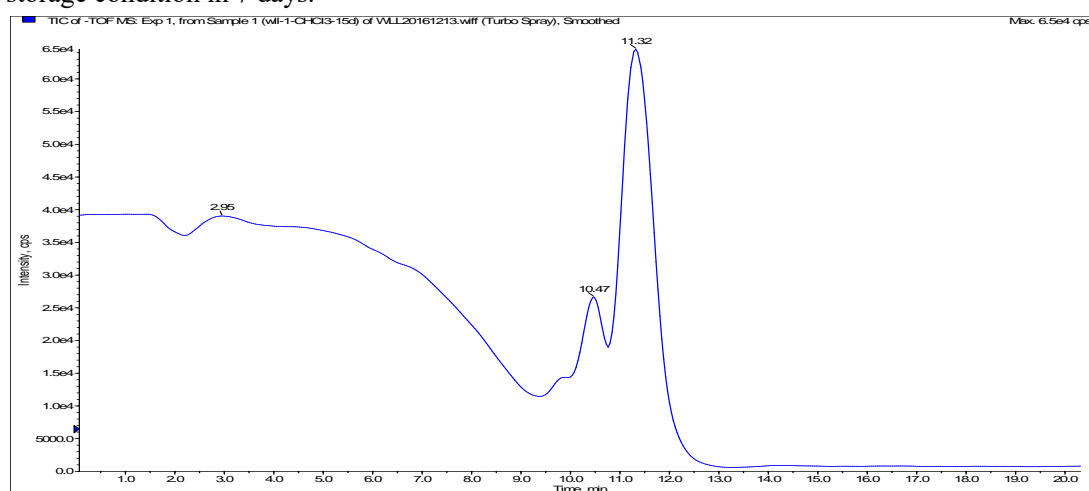

**Figure S69.** TIC of gossypol in  $\text{CHCl}_3$  solution normal condition without protect from air and light storage condition in 15 days.

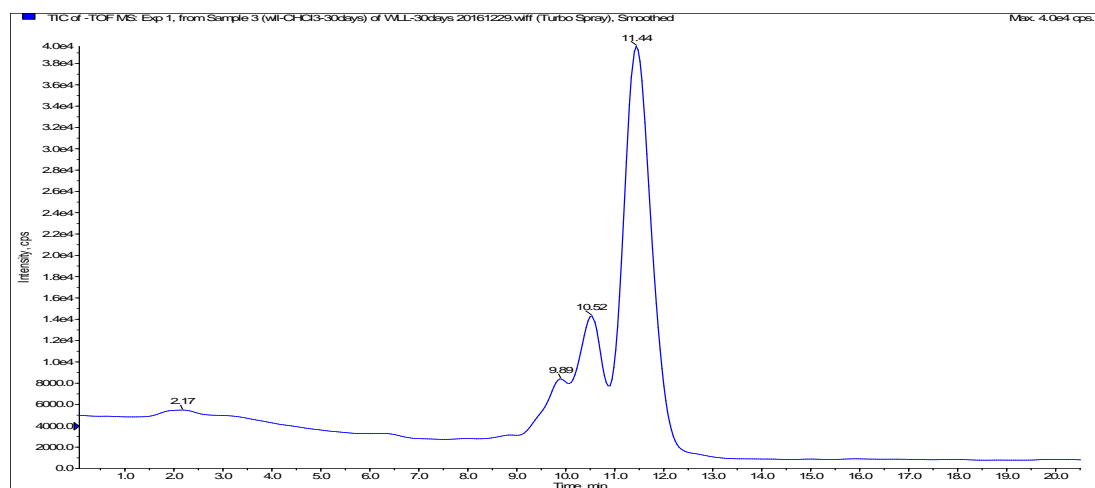

**Figure S70.** TIC of gossypol in  $\text{CHCl}_3$  solution normal condition without protect from air and light storage condition in 30 days.

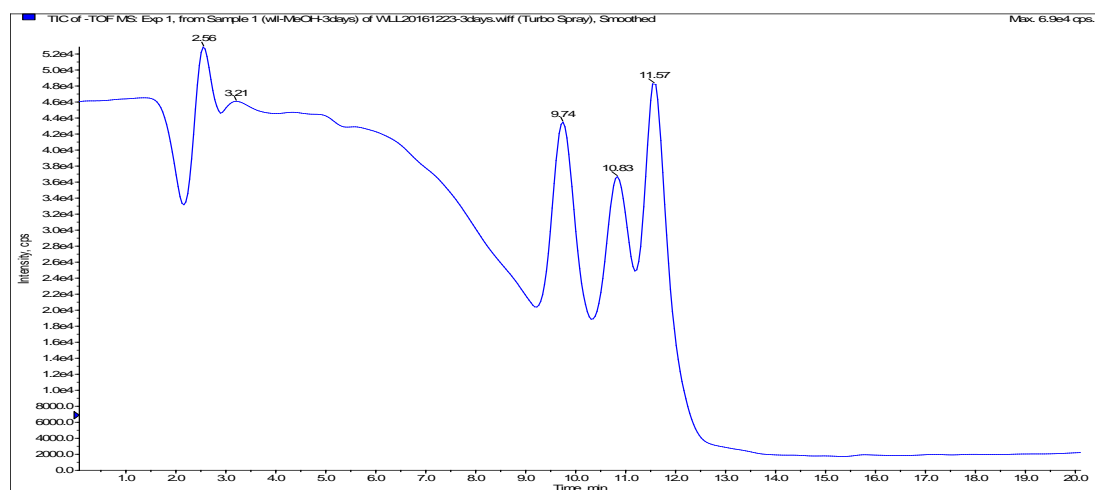

**Figure S71.** TIC of gossypol in  $\text{CH}_3\text{OH}$  solution normal condition without protect from air and light storage condition in 3 days.

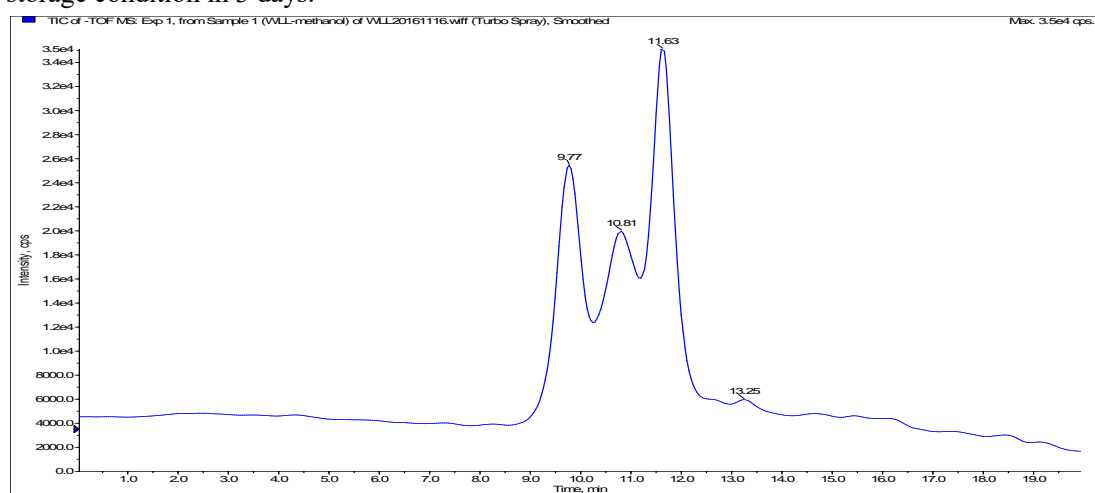

**Figure S72.** TIC of gossypol in  $\text{CH}_3\text{OH}$  solution normal condition without protect from air and light storage condition in 5 days.

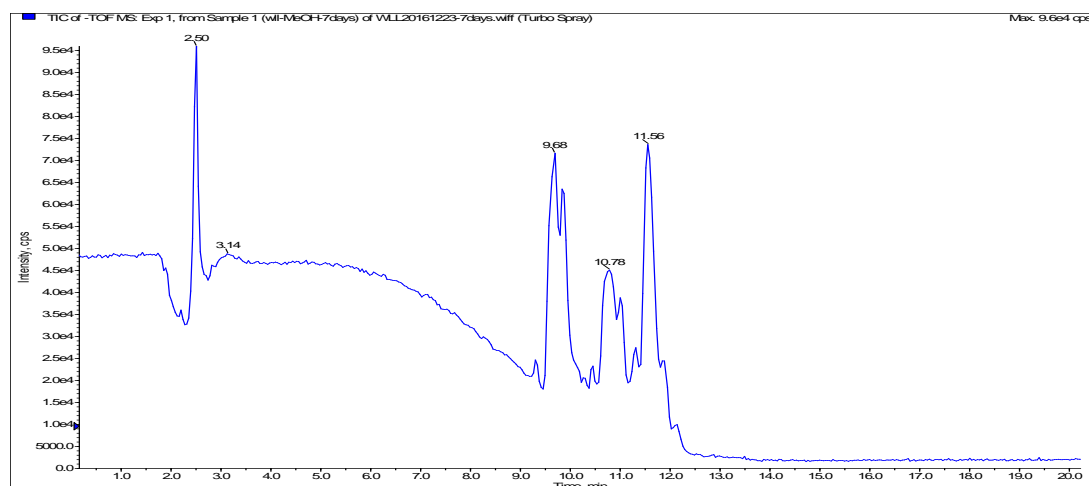

**Figure S73.** TIC of gossypol in  $\text{CH}_3\text{OH}$  solution normal condition without protect from air and light storage condition in 7 days.

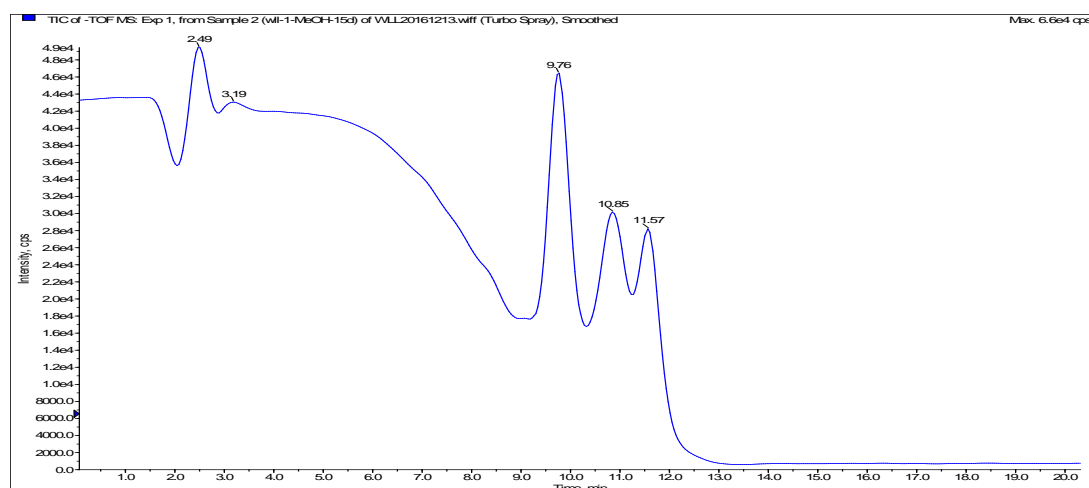

**Figure S74.** TIC of gossypol in  $\text{CH}_3\text{OH}$  solution normal condition without protect from air and light storage condition in 15 days.

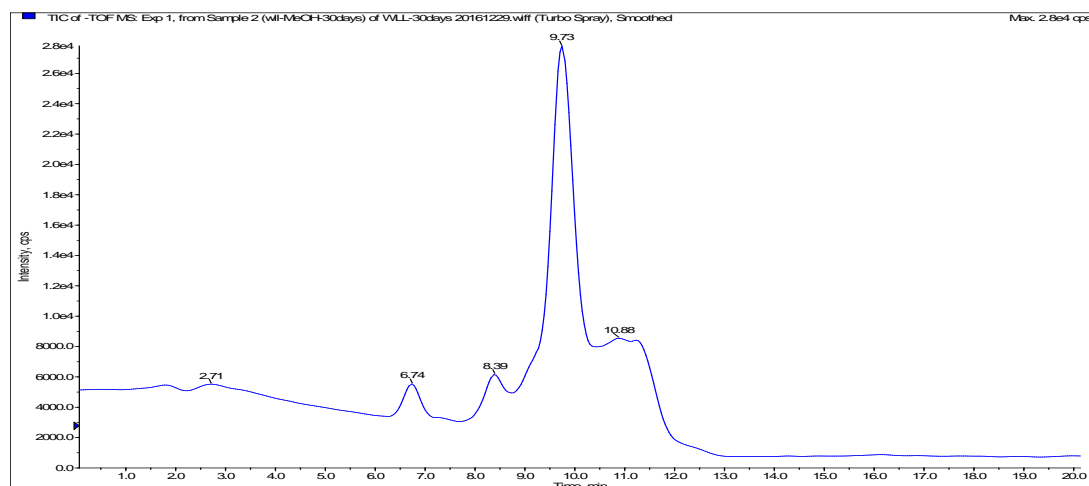

**Figure S75.** TIC of gossypol in  $\text{CH}_3\text{OH}$  solution normal condition without protect from air and light storage condition in 30 days.

## Reference

1. Brzezinski, B.; Rozwadowski, J.; Marciniak, B.; Paszyc, S. Spectroscopic study of gossypol-lanthanide cation complexes in acetonitrile solution. *J. Mol. Struct.* **1997**, 435, 275-279. doi: 10.1016/S0022-2860(97)00197-X.
